# Supplementary material for: Palygorskite-anchored Pd complexes catalyze the coupling reactions of pyrimidin-2-yl sulfonates
Source: Royal Society of Chemistry journal article supplement (doi:10.1039/c9ra06035a), 2019-01-01

## ***SUPPORTING INFORMATION***

### **Palygorskite-anchored Pd complex catalyzed the coupling reactions of pyrimidin-2-yl sulfonates**

Huiying Zhan,<sup>\*a</sup> Rongrong Zhou,<sup>a</sup> Xudong Chen,<sup>a</sup> Quanlu Yang,<sup>\*a</sup> Hongyan Jiang,<sup>b</sup> Qiong Su,<sup>b</sup> Yanbin

Wang,<sup>b</sup> Jia Li,<sup>b</sup> Lan Wu<sup>b</sup> and Shang Wu<sup>\*b</sup>

#### **Contents**

|                                                |     |
|------------------------------------------------|-----|
| 1. General Information .....                   | S1  |
| 2. General procedure.....                      | S3  |
| 3. Characterization data for the products..... | S8  |
| 4. NMR Spectra for products.....               | S18 |

#### **1. General Information**

All reactions were carried out under an atmosphere of air atmosphere with dry solvents in flame-dried glassware unless otherwise noted. Binding energy was referred to C<sub>1s</sub> (284.80 eV). FTIR spectroscopy patterns were obtained on an FT/IR-660 Plus system (Jasco, Tokyo, Japan). The samples were mixed with KBr powders and pressed into a disk suitable for FTIR measurement. The morphologies of the catalyst were examined with field emission scanning electron microscopy (FE-SEM, Ultra Plus, Carl Zeiss). Elemental analysis of the photocatalyst was conducted by an energy-dispersive X-ray spectrometer (EDX) attached to the scanning electron microscope. <sup>1</sup>H NMR and <sup>13</sup>C NMR data analyses were performed with a Varian Mercury plus-400 instrument unless otherwise specified. CDCl<sub>3</sub> as solvent and tetramethylsilane (TMS) as the internal standard were employed.

Chemical shifts were reported in units (ppm) by assigning TMS resonance in the  $^1\text{H}$  NMR spectrum as 0.00 ppm. The data of  $^1\text{H}$  NMR was reported as follows: chemical shift, multiplicity (s = singlet, d = doublet, t = triplet, m = multiplet and br = broad), coupling constant ( $J$  values) in Hz and integration. Chemical shift for  $^{13}\text{C}$  NMR spectra were recorded in ppm from TMS using the central peak of  $\text{CDCl}_3$  (77.0ppm) as the internal standard. Flash chromatography was performed using 200-300 mesh silica gel with the indicated solvent system according to standard techniques. Analytical thin-layer chromatography (TLC) was performed on pre-coated, glass-backed silica gel plates. Melting points were measured with an XT-4 apparatus. Reactions were monitored by TLC on silica gel plates (GF254), and the analytical thin-layer chromatography (TLC) was performed on precoated, glass-backed silica gel plates. N-(pyrimidin-2-yl)-1H-indoles were prepared according to literature procedures<sup>1</sup>. Palladium (II) acetate, alkynes, carboxylic acids,  $\text{Cu}_2\text{O}$ , P ligands and solvents were all purchased from J&K Scientific Ltd. All other reagents were purchased from commercial sources and used as received.

---

<sup>1</sup> X. C. Wang, G. J. Yang, Z. J. Quan, P. Y. Ji, J. L. Liang and R. G. Ren, *Synlett*, 2010, 1657-1660.

## 2. General procedure

### 2.1 General procedure for the Suzuki coupling reaction

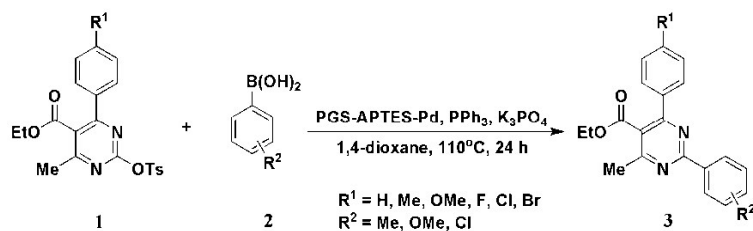

Schlenk tube (10 mL) was equipped with a magnetic stir bar, and **1a** (0.25 mmol), **2a** (1.5 equiv, 0.375 mmol), PPh<sub>3</sub> (20 mol%), PGS-APTES-Pd(OAc)<sub>2</sub> (20 mg, Pd 0.35 mol%), K<sub>3</sub>PO<sub>4</sub> (2.0 equiv. 0.5 mmol), 1,4-dioxane (5 mL) were added under Ar. The mixture was stirred in at 110 °C for 24 h. After the reaction was finished, the mixture was concentrated under vacuum to remove 1,4-dioxane, and the residue was purified by chromatography on silica gel to afford the product.

### 2.2 General procedure for the Sonogashira coupling reaction

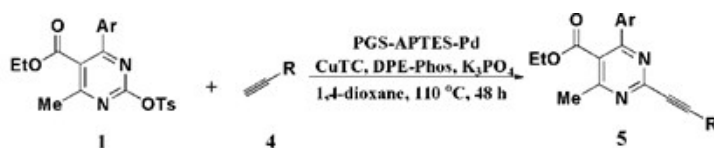

The Schlenk tube (10 mL) was equipped with a magnetic stir bar, and **1a** (0.25 mmol), **4a** (0.50 mmol), K<sub>3</sub>PO<sub>4</sub> (3 equiv.), CuTC (10 mol%), DPE-Phos (2 mol%), PGS-APTES-Pd(OAc)<sub>2</sub> (Pd 0.463 wt%, 0.0435 mmol/g), 1,4-dioxane (5 mL) were added under Ar. The mixture was stirred in at 110 °C for 48 h. After the reaction was finished, the mixture was concentrated under vacuum to remove 1,4-dioxane, and the residue was purified by chromatography on silica gel to afford the product.

### 2.3 General procedure for the C-N coupling reaction

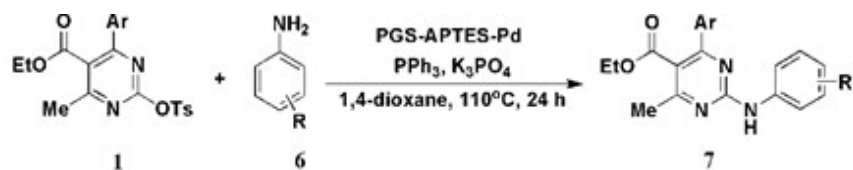

Schlenk tube (10 mL) was equipped with a magnetic stir bar, and **1a** (0.25 mmol), **6a** (0.38 mmol), PPh<sub>3</sub> (20 mol%), PGS-APTES-Pd(OAc)<sub>2</sub> (20 mg, Pd 0.35 mol%), K<sub>3</sub>PO<sub>4</sub> (2.0 equiv. 0.5 mmol), 1,4-dioxane (5 mL) were added under Ar. The mixture was stirred in at 110 °C for 24 h. After the reaction was finished, the mixture was concentrated under vacuum to remove 1,4-dioxane, and the residue was purified by chromatography on silica gel to afford the product.

## 2.4 Optimization for the conditions of Suzuki reaction

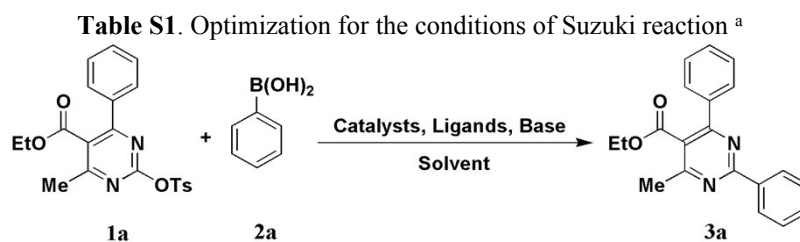

| Entry | Catalyst                               | Base                            | Ligand           | Solvent          | Yield <sup>b</sup> |
|-------|----------------------------------------|---------------------------------|------------------|------------------|--------------------|
| 1     | PGS-APTES-Pd(OAc) <sub>2</sub> (20 mg) | K <sub>3</sub> PO <sub>4</sub>  | DPE-Phos         | dioxane          | 72 %               |
| 2     | PGS-APTES-Pd(OAc) <sub>2</sub> (20 mg) | K <sub>3</sub> PO <sub>4</sub>  | X-Phos           | dioxane          | 75 %               |
| 3     | PGS-APTES-Pd(OAc) <sub>2</sub> (20 mg) | K <sub>3</sub> PO <sub>4</sub>  | PPh <sub>3</sub> | dioxane          | 88 %               |
| 4     | PGS-APTES-Pd(OAc) <sub>2</sub> (20 mg) | NaOAc                           | PPh <sub>3</sub> | dioxane          | 16 %               |
| 5     | PGS-APTES-Pd(OAc) <sub>2</sub> (20 mg) | TBAB                            | PPh <sub>3</sub> | dioxane          | trace              |
| 6     | PGS-APTES-Pd(OAc) <sub>2</sub> (20 mg) | Cs <sub>2</sub> CO <sub>3</sub> | PPh <sub>3</sub> | dioxane          | 32 %               |
| 7     | PGS-APTES-Pd(OAc) <sub>2</sub> (20 mg) | K <sub>2</sub> CO <sub>3</sub>  | PPh <sub>3</sub> | dioxane          | 37 %               |
| 8     | PGS-APTES-Pd(OAc) <sub>2</sub> (20 mg) | K <sub>3</sub> PO <sub>4</sub>  | PPh <sub>3</sub> | toluene          | trace              |
| 9     | PGS-APTES-Pd(OAc) <sub>2</sub> (20 mg) | K <sub>3</sub> PO <sub>4</sub>  | PPh <sub>3</sub> | CCl <sub>4</sub> | ---                |
| 10    | PGS-APTES-Pd(OAc) <sub>2</sub> (10 mg) | K <sub>3</sub> PO <sub>4</sub>  | PPh <sub>3</sub> | dioxane          | 57 %               |
| 11    | PGS-APTES-Pd(OAc) <sub>2</sub> (15 mg) | K <sub>3</sub> PO <sub>4</sub>  | PPh <sub>3</sub> | dioxane          | 68 %               |
| 12    | PGS-APTES-Pd(OAc) <sub>2</sub> (25 mg) | K <sub>3</sub> PO <sub>4</sub>  | PPh <sub>3</sub> | dioxane          | 88 %               |
| 13    | PGS (20 mg)                            | K <sub>3</sub> PO <sub>4</sub>  | PPh <sub>3</sub> | dioxane          | ---                |
| 14    | -                                      | K <sub>3</sub> PO <sub>4</sub>  | ---              | dioxane          | ---                |
| 15    | PGS-APTES-Pd(OAc) <sub>2</sub> (20 mg) | K <sub>3</sub> PO <sub>4</sub>  | ---              | dioxane          | 15 %               |
| 16    | Pd(OAc) <sub>2</sub> (0.35 mol%)       | K <sub>3</sub> PO <sub>4</sub>  | PPh <sub>3</sub> | dioxane          | 14 %               |

<sup>a</sup> Reaction condition: **1a** (0.25 mmol), **2a** (1.5 equiv. ), ligands (20 or 6 mol%), base (2.0 equiv. ), catalyst (Pd 0.463 wt %), solvent (5 mL), 110 °C, 24 h. <sup>b</sup> Isolated yield of **3a** by column chromatography.

## 2.5 Optimization for the conditions of Sonogashira reaction

**Table S2.** Optimization for the conditions of Sonogashira reaction <sup>a</sup>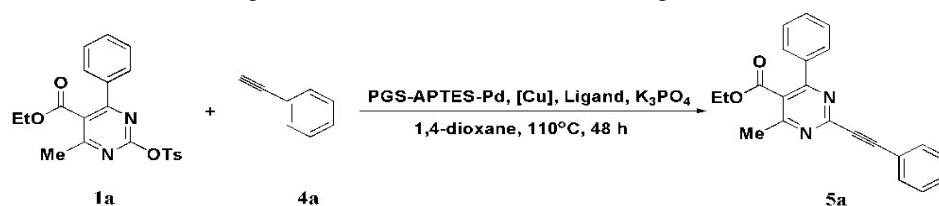

| Entry | Catalyst                               | Ligands          | [Cu]                 | Solvent | Time | Yield <sup>b</sup> |
|-------|----------------------------------------|------------------|----------------------|---------|------|--------------------|
| 1     | PGS-APTES-Pd(OAc) <sub>2</sub> (30 mg) | X-Phos           | CuI                  | Dioxane | 48 h | 13 %               |
| 2     | PGS-APTES-Pd(OAc) <sub>2</sub> (30 mg) | X-Phos           | Cu <sub>2</sub> O    | Dioxane | 48 h | 26 %               |
| 3     | PGS-APTES-Pd(OAc) <sub>2</sub> (30 mg) | X-Phos           | CuTC                 | Dioxane | 48 h | 59 %               |
| 4     | PGS-APTES-Pd(OAc) <sub>2</sub> (30 mg) | X-Phos           | Cu(OAc) <sub>2</sub> | Dioxane | 48 h | n.d. <sup>c</sup>  |
| 5     | PGS-APTES-Pd(OAc) <sub>2</sub> (30 mg) | PPh <sub>3</sub> | CuTC                 | Dioxane | 48 h | 22 %               |
| 6     | PGS-APTES-Pd(OAc) <sub>2</sub> (30 mg) | DPE-Phos         | CuTC                 | Dioxane | 48 h | 81 %               |
| 7     | PGS-APTES-Pd(OAc) <sub>2</sub> (30 mg) | DPE-Phos         | CuTC                 | Toluene | 48 h | 51 %               |
| 8     | PGS-APTES-Pd(OAc) <sub>2</sub> (30 mg) | DPE-Phos         | CuTC                 | Xylene  | 48 h | 67 %               |
| 9     | PGS-APTES-Pd(OAc) <sub>2</sub> (10 mg) | DPE-Phos         | CuTC                 | Dioxane | 48 h | 33 %               |
| 10    | PGS-APTES-Pd(OAc) <sub>2</sub> (20 mg) | DPE-Phos         | CuTC                 | Dioxane | 48 h | 80 %               |
| 11    | PGS-APTES-Pd(OAc) <sub>2</sub> (20 mg) | DPE-Phos         | CuTC                 | Dioxane | 12 h | 32 %               |
| 12    | PGS-APTES-Pd(OAc) <sub>2</sub> (20 mg) | DPE-Phos         | CuTC                 | Dioxane | 24 h | 68 %               |
| 13    | PGS-APTES-Pd(OAc) <sub>2</sub> (20 mg) | DPE-Phos         | CuTC                 | Dioxane | 72 h | 79 %               |
| 14    | -                                      | -                | CuTC                 | Dioxane | 48 h | n.d. <sup>c</sup>  |
| 15    | PGS-APTES-Pd(OAc) <sub>2</sub> (20 mg) | -                | CuTC                 | Dioxane | 48 h | 18 %               |

<sup>a</sup> Reaction condition: 1a (0.25 mmol), 4a (0.50 mmol), K<sub>3</sub>P<sub>0</sub><sub>4</sub> (equiv.), [Cu] (10 mol%), ligands (6 mol% PPh<sub>3</sub>, 2 mol% DPE-Phos or X-phos), PGS-APTES-Pd(OAc)<sub>2</sub> (Pd 0.463 wt%, 0.0435 mmol/g), solvent (5 mL); temperature: 110 °C for dioxane and toluene as solvent, 140 °C for xylene. <sup>b</sup> Isolated yield of 5a by column chromatography. <sup>c</sup> n.d. = No reaction was detected by TLC and <sup>1</sup>H NMR.

## 2.6 Optimization for the conditions of C-N coupling reactions

**Table S3.** Optimization for the conditions of C-N coupling reactions <sup>a</sup>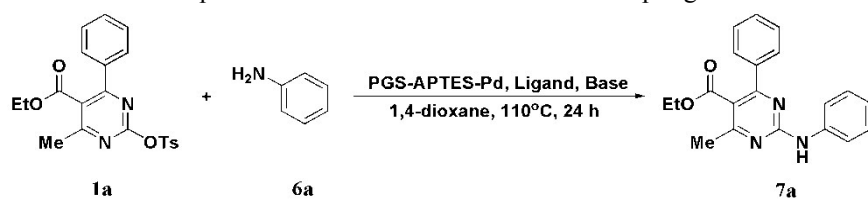

| Entry | Base                            | Ligands          | Yield <sup>b</sup> |
|-------|---------------------------------|------------------|--------------------|
| 1     | DBU                             | PPh <sub>3</sub> | 13 %               |
| 2     | Et <sub>3</sub> N               | PPh <sub>3</sub> | 45 %               |
| 3     | K <sub>2</sub> CO <sub>3</sub>  | PPh <sub>3</sub> | 21 %               |
| 4     | CS <sub>2</sub> CO <sub>3</sub> | PPh <sub>3</sub> | 17 %               |
| 5     | K <sub>3</sub> PO <sub>4</sub>  | DPE-Phos         | 67 %               |
| 6     | K <sub>3</sub> PO <sub>4</sub>  | X-Phos           | 54 %               |
| 7     | K <sub>3</sub> PO <sub>4</sub>  | -                | 41 %               |
| 8     | K <sub>3</sub> PO <sub>4</sub>  | PPh <sub>3</sub> | 76 %               |

<sup>a</sup> Reaction condition: **1a** (0.25 mmol), **6a** (0.38 mmol), PGS-APTES-Pd(OAc)<sub>2</sub> (Pd 0.463 wt%, 0.0435 mmol/g), ligands (20 mol% PPh<sub>3</sub>, 6 mol% DPE-Phos or X-phos), base (2.0 equiv.), 1,4-dioxane (5 mL), 110 °C, 24 h. <sup>b</sup> Isolated yield of **7a** by column chromatography.

### 3. Characterization data for the products

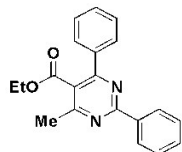

**Ethyl 4-methyl-2,6-diphenylpyrimidine-5-carboxylate (3a):** White solid; m.p. 66-67 °C. <sup>1</sup>H NMR (400 MHz, CDCl<sub>3</sub>): δ = 8.62- 8.59 (dd, *J* = 2.8 Hz, 6.4 Hz, 2H), 7.81-7.79 (m, 2H), 7.54-7.52 (m, 6H), 4.28-4.22 (q, *J* = 7.2 Hz, 2H), 2.75 (s, 3H), 1.14-1.10 (t, *J* = 7.2 Hz, 3H) ppm. <sup>13</sup>C NMR (100 MHz, CDCl<sub>3</sub>): δ = 168.5, 165.4, 163.7, 163.7, 138.2, 137.1, 131.1, 130.0, 128.7, 128.6, 128.5, 128.5, 123.4, 61.8, 22.9, 13.7 ppm.

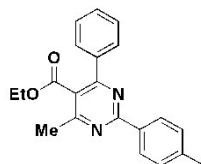

**Ethyl 4-methyl-6-phenyl-2-p-tolylpyrimidine-5-carboxylate (3b):** White solid; m.p. 61-63 °C. <sup>1</sup>H NMR (400 MHz, CDCl<sub>3</sub>): δ = 8.49-8.47 (d, *J* = 8.2 Hz, 2H), 7.79-7.77 (m, 2H), 7.54-7.46 (m, 3H), 7.33-7.31 (d, *J* = 8.1 Hz, 3H), 4.26-4.21 (q, *J* = 7.2 Hz, 2H), 2.72 (s, 3H), 2.46 (s, 3H), 1.12-1.10 (t, *J* = 7.2 Hz, 3H) ppm. <sup>13</sup>C NMR (100 MHz, CDCl<sub>3</sub>): δ = 168.5, 165.3, 163.7, 163.6, 141.5, 138.3, 134.4, 130.0, 129.3, 128.7, 128.5, 128.5, 123.1, 61.8, 22.7, 21.6, 13.7 ppm.

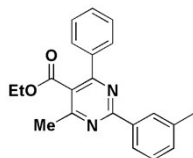

**Ethyl 4-methyl-6-phenyl-2-m-tolylpyrimidine-5-carboxylate (3c):** White solid, m.p. 69- 71 °C. <sup>1</sup>H NMR (400 MHz, CDCl<sub>3</sub>): δ = 8.27- 8.29 (d, *J* = 7.4 Hz, 2H), 7.69-7.67 (dd, *J* = 6.5 Hz, 3.1 Hz, 2H), 7.42-7.39 (m, 3H), 7.33-7.29 (t, *J* = 7.9 Hz, 1H), 7.25-7.23 (t, *J* = 7.5 Hz, 1H), 4.16-4.11 (q, *J* = 7.2 Hz,



2H), 2.62 (s, 3H), 2.38 (s, 3H), 1.02-0.99 (t,  $J = 7.2$  Hz, 3H) ppm.  $^{13}\text{C}$  NMR (100 MHz,  $\text{CDCl}_3$ ):  $\delta =$  168.4, 165.3, 163.8, 163.3, 138.2, 138.1, 137.0, 131.8, 129.9, 129.1, 128.5, 128.4, 125.8, 123.3, 61.7, 22.9, 21.5, 13.6 ppm.

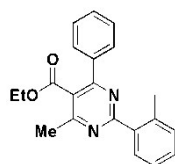

**Ethyl 4-methyl-6-phenyl-2-o-tolylpyrimidine-5-carboxylate (3d):** White solid; m.p. 77-78 °C.  $^1\text{H}$  NMR (400 MHz,  $\text{CDCl}_3$ ):  $\delta =$  7.87-7.79 (m, 1H), 7.73-7.57 (m, 2H), 7.46- 7.33 (m, 3H), 7.32-7.19 (m, 3H), 4.16 (q,  $J = 7.2$  Hz, 2H), 2.63 (s, 3H), 2.55 (s, 3H), 1.03 (t,  $J = 7.2$  Hz, 3H) ppm.  $^{13}\text{C}$  NMR (100 MHz,  $\text{CDCl}_3$ ):  $\delta =$  168.36, 166.75, 165.00, 163.12, 137.93, 137.62, 137.45, 131.31, 130.55, 129.97, 129.65, 128.48, 128.39, 125.93, 122.77, 61.86, 22.78, 21.32, 13.66 ppm.

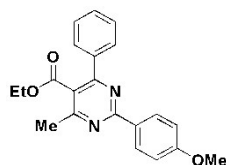

**Ethyl 2-(4-methoxyphenyl)-4-methyl-6-phenylpyrimidine-5-carboxylate (3e):** White solid; m.p. 57-59 °C.  $^1\text{H}$  NMR (400 MHz,  $\text{CDCl}_3$ ):  $\delta =$  8.49-8.39 (m, 2H), 7.72-7.60 (m, 2H), 7.46-7.32 (m, 3H), 6.95-6.85 (m, 2H), 4.11 (q,  $J = 7.2$  Hz, 2H), 3.79 (s, 3H), 2.59 (s, 3H), 0.99 (t,  $J = 7.2$  Hz, 3H) ppm.  $^{13}\text{C}$  NMR (100 MHz,  $\text{CDCl}_3$ ):  $\delta =$  168.54, 165.23, 163.53, 163.40, 162.13, 141.51, 138.41, 134.4, 130.34, 129.82, 128.39, 122.57, 113.79, 61.63, 55.33, 22.84, 13.63 ppm.

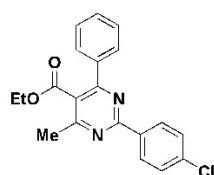

**Ethyl 2-(4-chlorophenyl)-4-methyl-6-phenylpyrimidine-5-carboxylate (3f):** White solid; m.p. 84-86 °C. <sup>1</sup>H NMR (400 MHz, CDCl<sub>3</sub>): δ = 8.51-8.36 (m, 2H), 7.80-7.56 (m, 2H), 7.52-7.29 (m, 5H), 4.13 (q, *J* = 7.2 Hz, 2H), 2.61 (s, 3H), 1.01 (t, *J* = 7.2 Hz, 3H) ppm. <sup>13</sup>C NMR (100 MHz, CDCl<sub>3</sub>): δ = 168.25, 165.48, 163.63, 162.64, 138.04, 137.29, 135.59, 130.00, 129.96, 128.70, 128.44, 128.41, 123.52, 61.80, 22.80, 13.64 ppm.

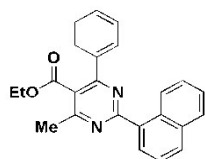

**Ethyl 4-methyl-2-(naphthalen-1-yl)-6-phenylpyrimidine-5-carboxylate (3g):** White solid; m.p. 83-85 °C. <sup>1</sup>H NMR (400 MHz, CDCl<sub>3</sub>): δ = 8.62-8.60 (m, 1H), 8.06 (dd, *J* = 7.2, 1.2 Hz, 1H), 7.89 (d, *J* = 8.2 Hz, 1H), 7.87-7.80 (m, 1H), 7.77-7.65 (m, 2H), 7.59-7.31 (m, 6H), 4.18 (q, *J* = 7.2 Hz, 2H), 2.69 (s, 3H), 1.05 (t, *J* = 7.2 Hz, 3H) ppm. <sup>13</sup>C NMR (101 MHz, CDCl<sub>3</sub>): δ = 168.26, 166.35, 165.29, 163.53, 137.85, 135.41, 134.05, 130.96, 130.73, 130.06, 129.58, 128.55, 128.42, 126.85, 125.85, 125.70, 125.16, 123.18, 109.69, 61.93, 22.86, 13.67 ppm.

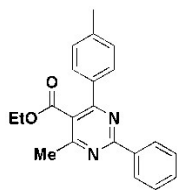

**Ethyl 4-methyl-2-phenyl-6-p-tolylpyrimidine-5-carboxylate (3h):** White solid; m.p. 66-67 °C. <sup>1</sup>H NMR (400 MHz, CDCl<sub>3</sub>): δ = 8.60-8.38 (m, 2H), 7.60 (d, *J* = 8.1 Hz, 2H), 7.46-7.35 (m, 3H), 7.23-7.17 (m, 2H), 4.16 (q, *J* = 7.2 Hz, 2H), 2.60 (s, 3H), 2.34 (s, 3H), 1.06 (t, *J* = 7.2 Hz, 3H) ppm. <sup>13</sup>C NMR (100 MHz, CDCl<sub>3</sub>): δ = 168.63, 165.14, 163.59, 163.34, 140.23, 137.23, 135.30, 130.91, 129.17, 128.58, 128.44, 128.41, 123.14, 61.72, 22.81, 21.38, 13.73 ppm.

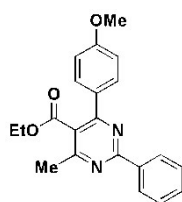

**Ethyl 4-(4-methoxyphenyl)-6-methyl-2-phenylpyrimidine-5-carboxylate (3i):** Colorless oil.  $^1\text{H}$  NMR (400 MHz,  $\text{CDCl}_3$ ):  $\delta$  = 8.54-8.43 (m, 2H), 7.77-7.62 (m, 2H), 7.45-7.36 (m, 3H), 6.88 (d,  $J$  = 8.8 Hz, 2H), 4.15 (q,  $J$  = 7.2 Hz, 2H), 3.72 (s, 3H), 2.56 (s, 3H), 1.05 (t,  $J$  = 7.2 Hz, 3H) ppm.  $^{13}\text{C}$  NMR (100 MHz,  $\text{CDCl}_3$ ):  $\delta$  = 168.72, 164.98, 163.36, 162.53, 161.17, 137.14, 130.82, 130.32, 130.01, 128.44, 128.36, 122.68, 113.80, 61.66, 55.24, 22.71, 13.73 ppm.

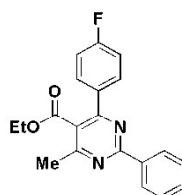

**Ethyl 4-(4-fluorophenyl)-6-methyl-2-phenylpyrimidine-5-carboxylate (3j):** White solid; m.p. 85-86 °C.  $^1\text{H}$  NMR (400 MHz,  $\text{CDCl}_3$ ):  $\delta$  = 8.46 (dd,  $J$  = 6.8, 3.0 Hz, 2H), 7.77-7.62 (m, 2H), 7.48-7.33 (m, 3H), 7.11-7.06 (m, 2H), 4.16 (q,  $J$  = 7.2 Hz, 2H), 2.61 (s, 3H), 1.06 (t,  $J$  = 7.2 Hz, 3H) ppm.  $^{13}\text{C}$  NMR (100 MHz,  $\text{CDCl}_3$ ):  $\delta$  = 168.33, 165.46, 165.20, 163.65, 162.71, 162.28, 136.97, 134.28, 131.10, 130.58, 130.50, 128.58, 128.50, 123.16, 115.66, 115.44, 61.84, 22.82, 13.74 ppm.

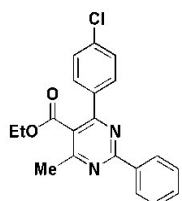

**Ethyl 4-(4-chlorophenyl)-6-methyl-2-phenylpyrimidine-5-carboxylate (3k):** White solid; m.p. 83-84 °C.  $^1\text{H}$  NMR (400 MHz,  $\text{CDCl}_3$ ):  $\delta$  = 8.52-8.41 (m, 2H), 7.69-7.59 (m, 2H), 7.47-7.34 (m, 5H), 4.16

(q,  $J = 7.2$  Hz, 2H), 2.62 (s, 3H), 1.07 (t,  $J = 7.2$  Hz, 3H) ppm.  $^{13}\text{C}$  NMR (100 MHz,  $\text{CDCl}_3$ ):  $\delta =$  168.15, 165.55, 163.66, 162.31, 136.81, 136.56, 136.36, 131.20, 129.85, 128.73, 128.63, 128.52, 123.19, 61.92, 22.79, 13.74 ppm.

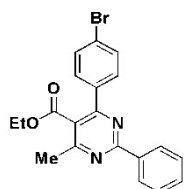

**Ethyl 4-(4-bromophenyl)-6-methyl-2-phenylpyrimidine-5-carboxylate (31):** White solid; m.p. 87-89 °C.  $^1\text{H}$  NMR (400 MHz,  $\text{CDCl}_3$ ):  $\delta = 8.50$  (m, 2H), 7.78 (d,  $J = 8.4$  Hz, 2H), 7.47-7.37 (m, 5H), 4.19 (q,  $J = 7.2$  Hz, 2H), 2.63 (s, 3H), 1.06 (t,  $J = 7.2$  Hz, 3H) ppm.  $^{13}\text{C}$  NMR (100 MHz,  $\text{CDCl}_3$ ):  $\delta = 168.52$ , 165.39, 163.06, 137.14, 137.00, 131.02, 128.94, 128.87, 128.60, 128.49, 127.78, 127.18, 127.16, 123.22, 61.82, 22.88, 13.72 ppm.

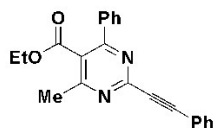

**Ethyl 4-methyl-6-phenyl-2-(phenylethynyl)pyrimidine-5-carboxylate (5a):** White solid; m.p. 161-162 °C.  $^1\text{H}$  NMR (400 MHz,  $\text{CDCl}_3$ ):  $\delta = 7.70$ -7.66 (m, 4H), 7.48-7.39 (m, 3H), 7.38-7.27 (m, 3H), 4.22-4.17 (q,  $J = 8.0$  Hz, 2H), 2.67 (s, 3H), 1.06 (t,  $J = 8.0$  Hz, 3H) ppm.  $^{13}\text{C}$  NMR (100 MHz,  $\text{CDCl}_3$ )  $\delta = 167.53$ , 165.59, 164.08, 152.38, 137.19, 132.85, 132.54, 130.40, 130.01, 129.91, 129.52, 128.75, 126.53, 128.38, 128.17, 124.19, 121.25, 88.53, 88.09, 61.98, 22.47, 13.48 ppm.

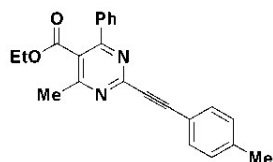

**Ethyl 4-Methyl-6-phenyl-2-(p-tolylethynyl)pyrimidine-5-carboxylate (5b):** Yellow oil.  $^1\text{H}$  NMR (400 MHz,  $\text{CDCl}_3$ ):  $\delta = 7.65\text{--}7.56$  (m, 2H), 7.51 (d,  $J = 8.0$  Hz, 2H), 7.45–7.33 (m, 3H), 7.10 (d,  $J = 7.9$  Hz, 2H), 4.12 (q,  $J = 7.2$  Hz, 2H), 2.58 (s, 3H), 2.30 (s, 3H), 0.99 (t,  $J = 7.2$  Hz, 3H) ppm.  $^{13}\text{C}$  NMR (100 MHz,  $\text{CDCl}_3$ )  $\delta = 167.57, 165.54, 164.05, 152.47, 140.17, 137.20, 132.65, 130.16, 129.13, 128.54, 128.29, 124.00, 118.09, 89.07, 87.66, 61.96, 22.61, 21.63, 13.58$  ppm.

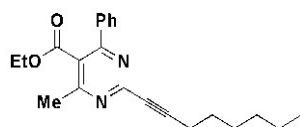

**Ethyl 4-Methyl-2-(oct-1-ynyl)-6-phenylpyrimidine-5-carboxylate (5c):** Yellow oil.  $^1\text{H}$  NMR (400 MHz,  $\text{CDCl}_3$ ):  $\delta = 7.63\text{--}7.49$  (m, 2H), 7.47–7.28 (m, 3H), 4.10 (q,  $J = 7.2$  Hz, 2H), 2.54 (s, 3H), 2.40 (t,  $J = 7.3$  Hz, 2H), 1.65–1.53 (m, 2H), 1.43–1.33 (m, 2H), 1.28–1.19 (m, 4H), 0.97 (t,  $J = 7.2$  Hz, 3H), 0.81 (t,  $J = 6.7$  Hz, 3H) ppm.  $^{13}\text{C}$  NMR (100 MHz,  $\text{CDCl}_3$ ):  $\delta = 167.58, 165.39, 163.91, 152.27, 137.18, 130.06, 128.44, 128.25, 123.95, 91.65, 79.93, 61.87, 31.25, 28.70, 27.89, 22.52, 22.43, 19.41, 13.99, 13.53$  ppm.

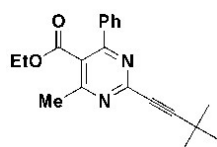

**Ethyl 2-(3,3-Dimethylbut-1-ynyl)-4-methyl-6-phenylpyrimidine-5-carboxylate (5d):** White solid; m.p. 98–99 °C.  $^1\text{H}$  NMR (400 MHz,  $\text{CDCl}_3$ ):  $\delta = 7.57\text{--}7.36$  (m, 2H), 7.46–7.25 (m, 3H), 4.10 (q,  $J = 7.2$  Hz, 2H), 2.54 (s, 3H), 1.30 (s, 9H), 0.97 (t,  $J = 7.2$  Hz, 3H) ppm.  $^{13}\text{C}$  NMR (100 MHz,  $\text{CDCl}_3$ )  $\delta = 167.61, 165.29, 163.90, 152.51, 137.33, 129.99, 128.43, 128.29, 123.94, 98.45, 78.87, 61.82, 30.38,$

27.90, 22.52, 13.54 ppm.

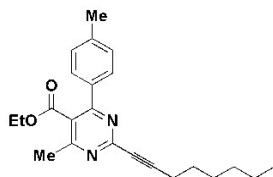

**Ethyl 4-Methyl-2-(oct-1-ynyl)-6-p-tolylpyrimidine-5-carboxylate (5e):** Yellow oil.  $^1\text{H}$  NMR (400 MHz,  $\text{CDCl}_3$ ):  $\delta$  = 7.48 (dd,  $J$  = 8.2, 2.0 Hz, 2 H), 7.18–7.14 (m, 2H), 4.13 (dd,  $J$  = 7.2, 2.9 Hz, 2H), 2.52 (d,  $J$  = 2.5 Hz, 3 H), 2.42–2.37 (m, 2H), 2.31 (d,  $J$  = 2.6 Hz, 3H), 1.64–1.54 (m, 2 H), 1.38 (dd,  $J$  = 13.1, 6.4 Hz, 2H), 1.28–1.16 (m, 4H), 1.05–1.01 (m, 3H), 0.82–0.79 (m, 3 H) ppm.  $^{13}\text{C}$  NMR (100 MHz,  $\text{CDCl}_3$ ):  $\delta$  = 167.83, 165.15, 163.72, 152.25, 140.42, 134.27, 129.17, 128.28, 123.80, 91.41, 80.03, 61.86, 31.27, 28.71, 27.92, 22.50, 22.45, 21.35, 19.43, 14.00, 13.64 ppm.

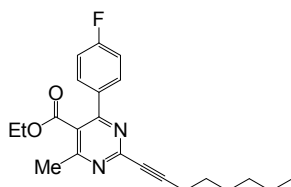

**Ethyl 4-(4-Fluorophenyl)-6-methyl-2-(oct-1-ynyl)pyrimidine-5-carboxylate (5f):** Yellow oil (331 mg, 90%).  $^1\text{H}$  NMR (400 MHz,  $\text{CDCl}_3$ ):  $\delta$  = 7.64–7.51 (m, 2H), 7.04 (dd,  $J$  = 11.9, 5.3 Hz, 2H), 3.71–3.55 (m, 3H), 2.39 (t,  $J$  = 7.3 Hz, 2H), 1.67–1.50 (m, 2H), 1.41–1.32 (m, 2H), 1.23 (t,  $J$  = 6.9 Hz, 9H), 0.80 (d,  $J$  = 1.2 Hz, 3H) ppm.  $^{13}\text{C}$  NMR (100 MHz,  $\text{CDCl}_3$ ):  $\delta$  = 173.16, 168.23, 165.03, 162.54, 162.20, 152.74, 133.33, 130.29, 130.21, 122.79, 115.67, 115.66, 115.44, 90.99, 80.23, 52.56, 33.35, 31.14, 28.60, 27.83, 22.33, 21.45, 19.37, 13.86 ppm.

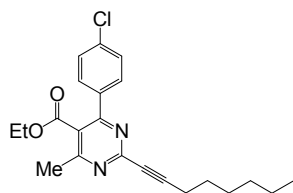

**Ethyl 4-(4-Chlorophenyl)-6-methyl-2-(oct-1-ynyl)pyrimidine-5-carboxylate (5g):** Yellow oil (350 mg, 91%).  $^1\text{H}$  NMR (400 MHz,  $\text{CDCl}_3$ ):  $\delta$  = 7.58–7.45 (m, 2H), 7.42–7.31 (m, 2H), 4.11–4.17 (m, 2H), 2.54 (d,  $J$  = 1.2 Hz, 3H), 2.40 (t,  $J$  = 7.3 Hz, 2H), 1.65–1.54 (m, 2H), 1.43–1.34 (m, 2H), 1.28–1.19 (m, 4H), 1.07–1.03 (m, 3H), 0.85–0.76 (m, 3H) ppm.  $^{13}\text{C}$  NMR (100 MHz,  $\text{CDCl}_3$ ):  $\delta$  = 167.43, 165.64, 162.59, 152.33, 136.52, 135.59, 129.73, 128.75, 123.84, 92.04, 79.86, 62.07, 31.27, 29.65, 28.72, 27.90, 22.56, 22.45, 19.44, 14.01, 13.67 ppm.

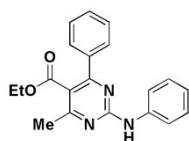

**Ethyl 4-methyl-6-phenyl-2-(phenylamino)pyrimidine-5-carboxylate (7a):** Colourless oil.  $^1\text{H}$  NMR (400 MHz,  $\text{CDCl}_3$ )  $\delta$  = 7.71 (s, 1H), 7.61–7.45 (m, 4H), 7.38–7.27 (m, 3H), 7.18 (t,  $J$  = 7.9 Hz, 2H), 6.92 (dd,  $J$  = 11.4, 4.2 Hz, 1H), 4.00 (q,  $J$  = 7.1 Hz, 2H), 2.46 (s, 3H), 0.87 (t,  $J$  = 7.1 Hz, 3H).  $^{13}\text{C}$  NMR (101 MHz,  $\text{CDCl}_3$ )  $\delta$  = 168.41, 167.17, 165.73, 158.71, 139.01, 138.52, 129.60, 128.71, 128.23, 127.96, 122.57, 119.16, 116.93, 61.19, 22.88, 13.46 ppm.

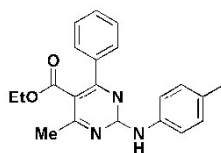

**Ethyl 4-methyl-6-phenyl-2-(*p*-tolylamino)pyrimidine-5-carboxylate (7b):** Brown oil,  $^1\text{H}$  NMR (400 MHz,  $\text{CDCl}_3$ )  $\delta$  7.67 (s, 1H), 7.64–7.56 (m, 2H), 7.50 (dd,  $J$  = 8.3, 1.5 Hz, 2H), 7.42 (dd,  $J$  = 4.3,

2.6 Hz, 3H), 7.10 (d,  $J = 7.5$  Hz, 2H), 4.12-4.06 (m, 2H), 2.55 (d,  $J = 1.8$  Hz, 3H), 2.30 (s, 3H), 0.99-0.95 (m, 3H).  $^{13}\text{C}$  NMR (101 MHz,  $\text{CDCl}_3$ )  $\delta = 168.48, 167.17, 165.76, 158.79, 138.62, 136.38, 132.19, 129.55, 129.22, 128.21, 127.96, 119.42, 116.64, 61.15, 22.91, 20.70, 13.47$  ppm.

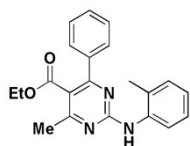

**Ethyl 4-methyl-6-phenyl-2-(*o*-tolylamino)pyrimidine-5-carboxylate (7c):** Brown oil,  $^1\text{H}$  NMR (400 MHz,  $\text{CDCl}_3$ )  $\delta = 8.07$  (d,  $J = 8.1$  Hz, 1H), 7.61-7.46 (m, 2H), 7.35 (dd,  $J = 5.1, 1.8$  Hz, 3H), 7.20-7.10 (m, 2H), 6.97 (dd,  $J = 8.5, 11.1$  Hz, 2H), 4.02 (q,  $J = 7.1$  Hz, 2H), 2.47 (s, 3H), 2.26 (s, 3H), 0.91 (t,  $J = 7.1$  Hz, 3H).  $^{13}\text{C}$  NMR (101 MHz,  $\text{CDCl}_3$ )  $\delta = 168.51, 167.26, 165.88, 159.09, 138.59, 136.98, 130.40, 129.63, 128.30, 127.99, 126.50, 121.51, 117.02, 61.23, 22.92, 18.16, 13.53$  ppm.

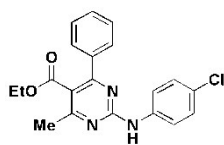

**Ethyl 2-(4-chlorophenylamino)-4-methyl-6-phenylpyrimidine-5-carboxylate (7d):** Colourless oil.  $^1\text{H}$  NMR (400 MHz,  $\text{CDCl}_3$ )  $\delta = 7.97$  (s, 1H), 7.71-7.57 (m, 2H), 7.56-7.47 (m, 2H), 7.41 (d,  $J = 5.8$  Hz, 3H), 7.24-7.17 (m, 2H), 4.11 (q,  $J = 7.1$  Hz, 2H), 2.55 (s, 3H), 0.98 (dd,  $J = 7.7, 6.6$  Hz, 3H).  $^{13}\text{C}$  NMR (101 MHz,  $\text{CDCl}_3$ ):  $\delta = 168.28, 167.24, 165.70, 158.53, 138.30, 137.63, 129.75, 128.60, 128.29, 127.95, 127.32, 120.40, 117.25, 61.30, 22.88, 13.52$  ppm.

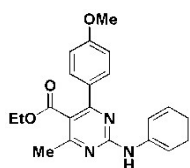



**Ethyl 4-(4-methoxyphenyl)-6-methyl-2-(phenylamino)pyrimidine-5-carboxylate (7e):** Claybank oil,

$^1\text{H}$  NMR (300 MHz,  $\text{CDCl}_3$ )  $\delta$  = 7.56 (d,  $J$  = 10.1 Hz, 1H), 7.34 (d,  $J$  = 8.5 Hz, 4H), 7.06-6.95 (m, 2H),

6.72 (t,  $J$  = 7.4 Hz, 1H), 6.68-6.61 (m, 2H), 3.88 (q,  $J$  = 7.1 Hz, 2H), 3.52 (s, 3H), 2.24 (s, 3H), 0.80 (t,

$J$  = 7.1 Hz, 3H).  $^{13}\text{C}$  NMR (75 MHz,  $\text{CDCl}_3$ )  $\delta$  = 168.90, 166.83, 164.88, 161.05, 158.78, 139.26,

130.80, 129.77, 128.75, 122.55, 119.27, 116.67, 113.75, 61.30, 55.28, 22.83, 13.75 ppm.

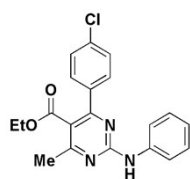

**Ethyl 4-(4-chlorophenyl)-6-methyl-2-(phenylamino)pyrimidine-5-carboxylate (7f):** White solid,

m.p. 129-130 °C,  $^1\text{H}$  NMR (300 MHz,  $\text{CDCl}_3$ )  $\delta$  = 7.54 (s, 1H), 7.46-7.27 (m, 4H), 7.19-7.14 (m, 2H),

7.09-7.04 (m, 2H), 6.87-6.75 (m, 1H), 3.98-3.86 (m, 2H), 2.42-2.26 (m, 3H), 0.92- 0.74 (m, 3H).  $^{13}\text{C}$

NMR (75 MHz,  $\text{CDCl}_3$ )  $\delta$  = 168.38, 167.60, 164.61, 158.92, 139.08, 137.15, 136.02, 129.62, 128.93,

128.65, 122.98, 119.50, 116.97, 61.52, 23.12, 13.78 ppm.

## 4. NMR Spectra for products

$^1\text{H}$  and  $^{13}\text{C}$  Spectra of compound 3a ( $\text{CDCl}_3$ , 400 MHz)

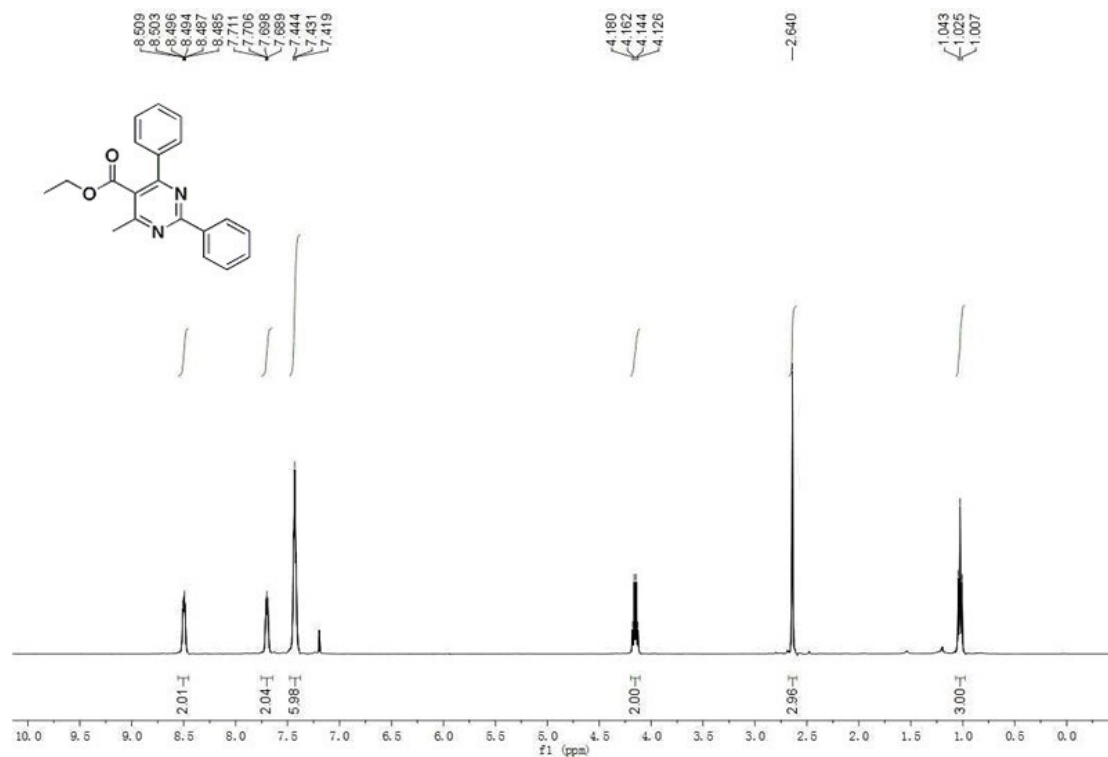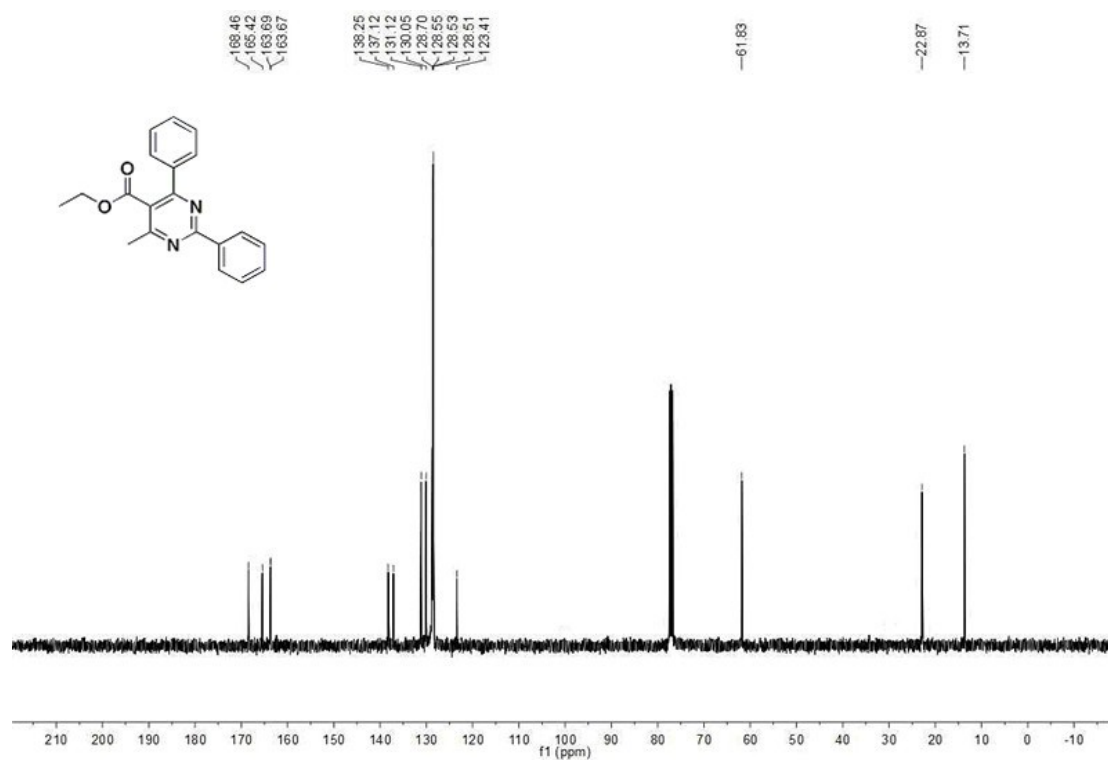

**<sup>1</sup>H and <sup>13</sup>C Spectra of compound 3b (CDCl<sub>3</sub>, 400 MHz)**

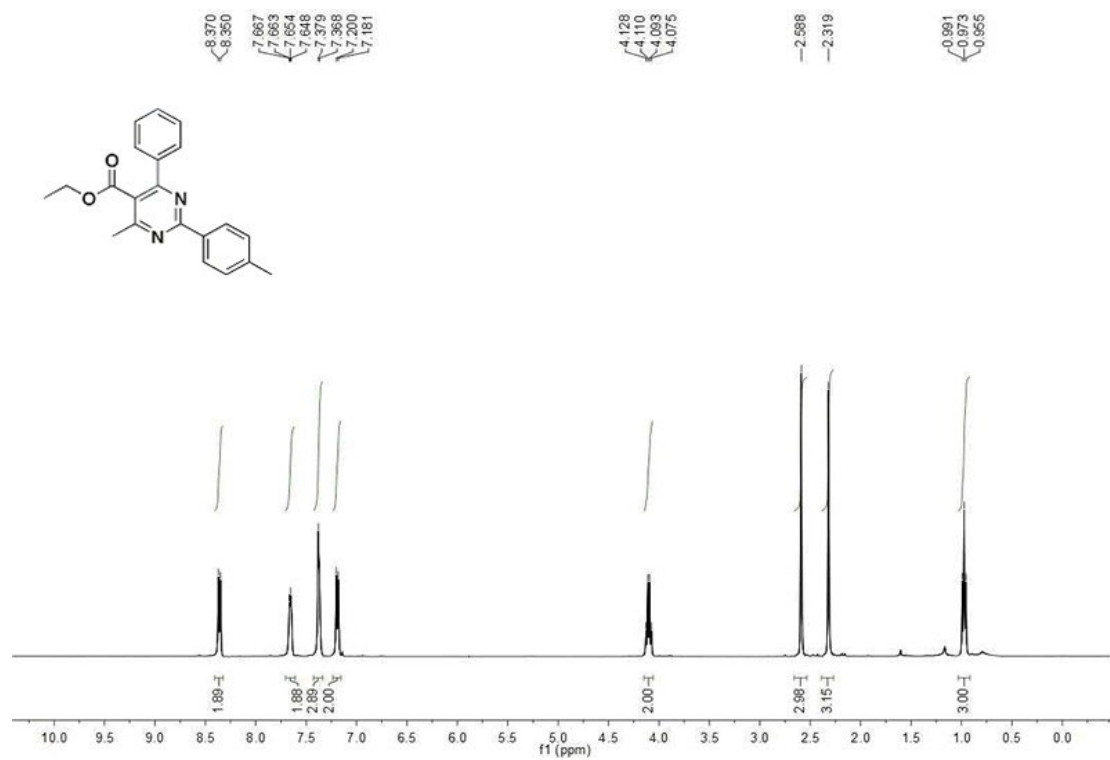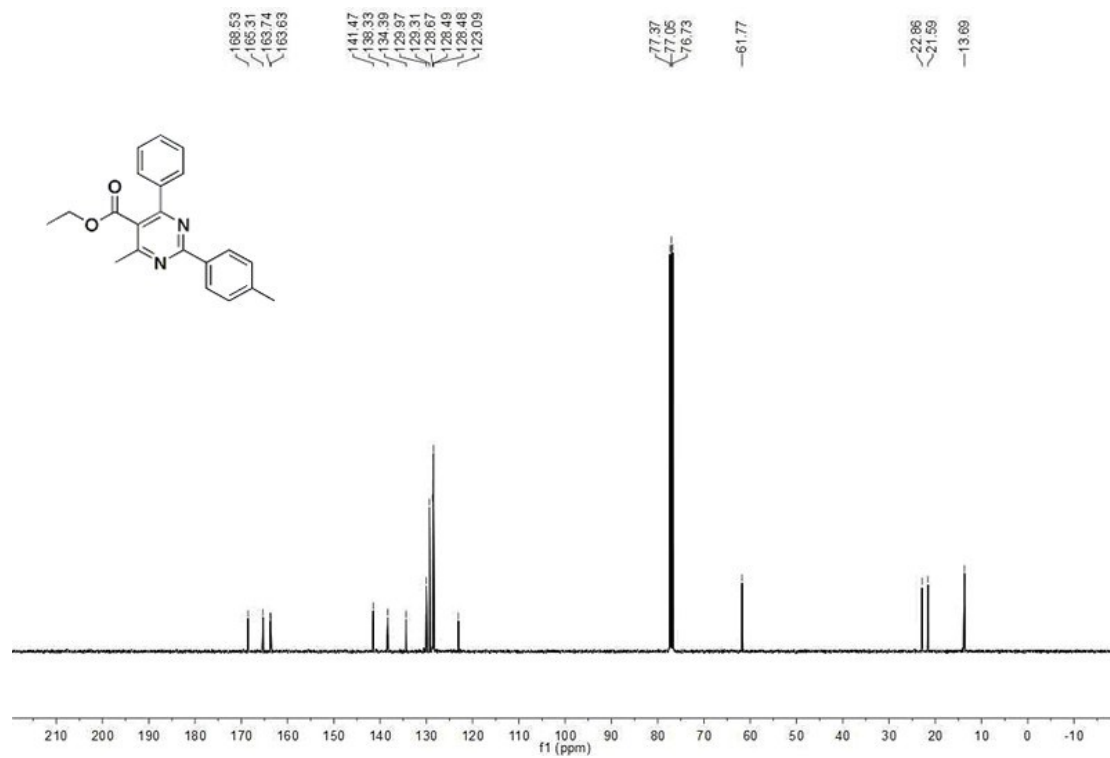

**<sup>1</sup>H and <sup>13</sup>C Spectra of compound 3c (CDCl<sub>3</sub>, 400 MHz)**

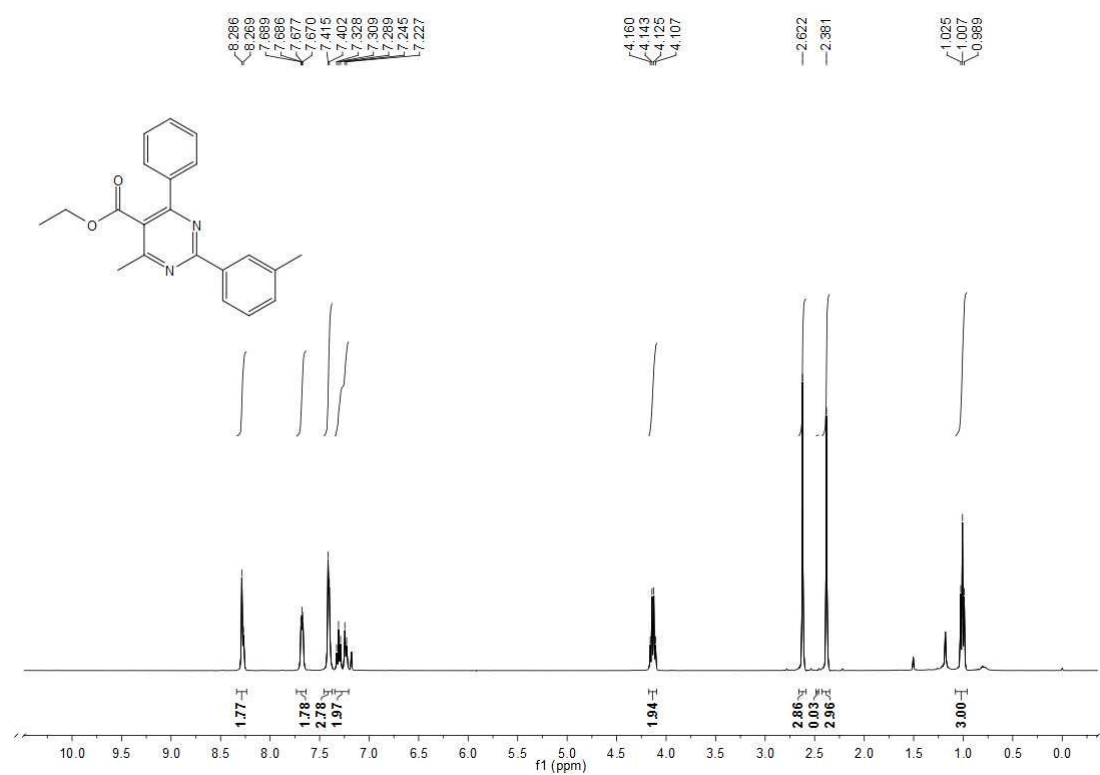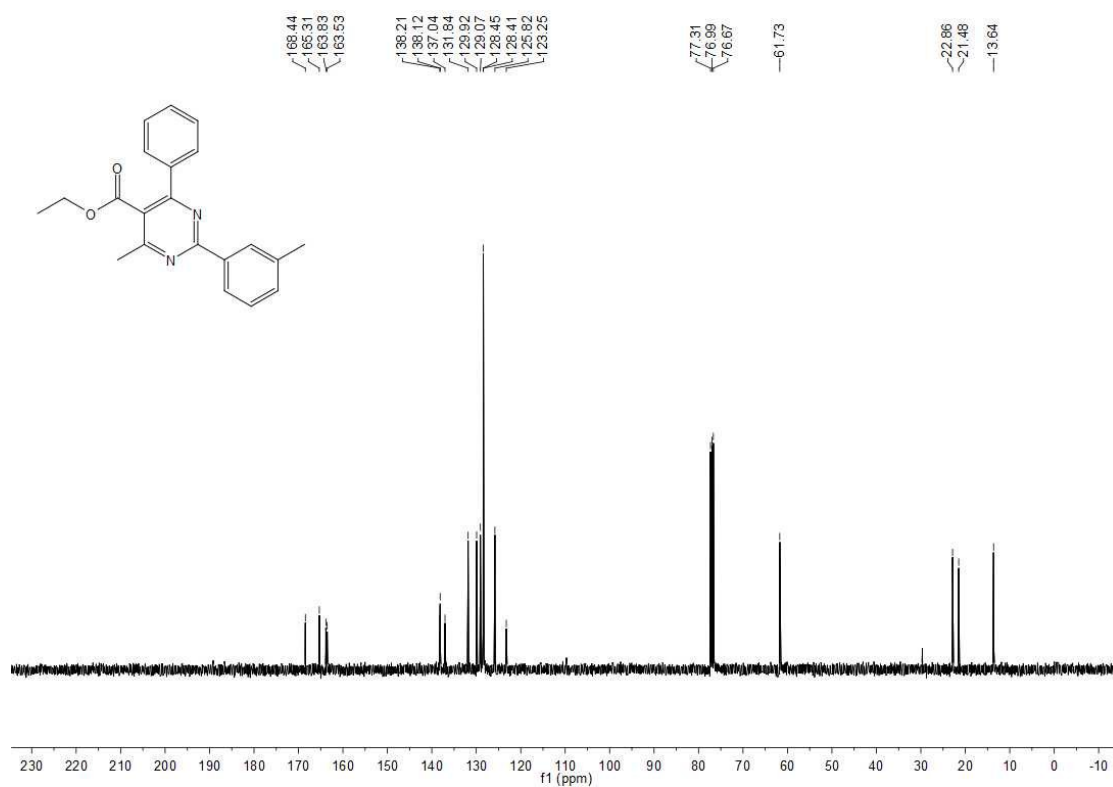

**<sup>1</sup>H and <sup>13</sup>C Spectra of compound 3d (CDCl<sub>3</sub>, 400 MHz)**

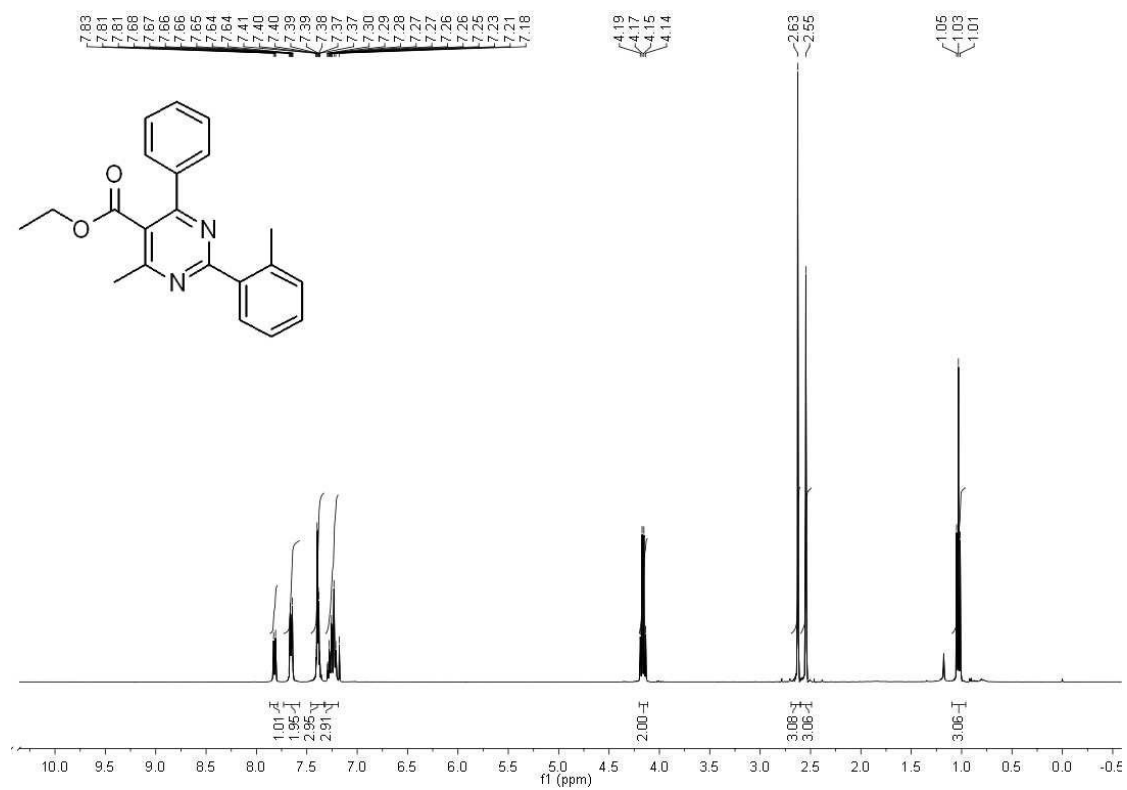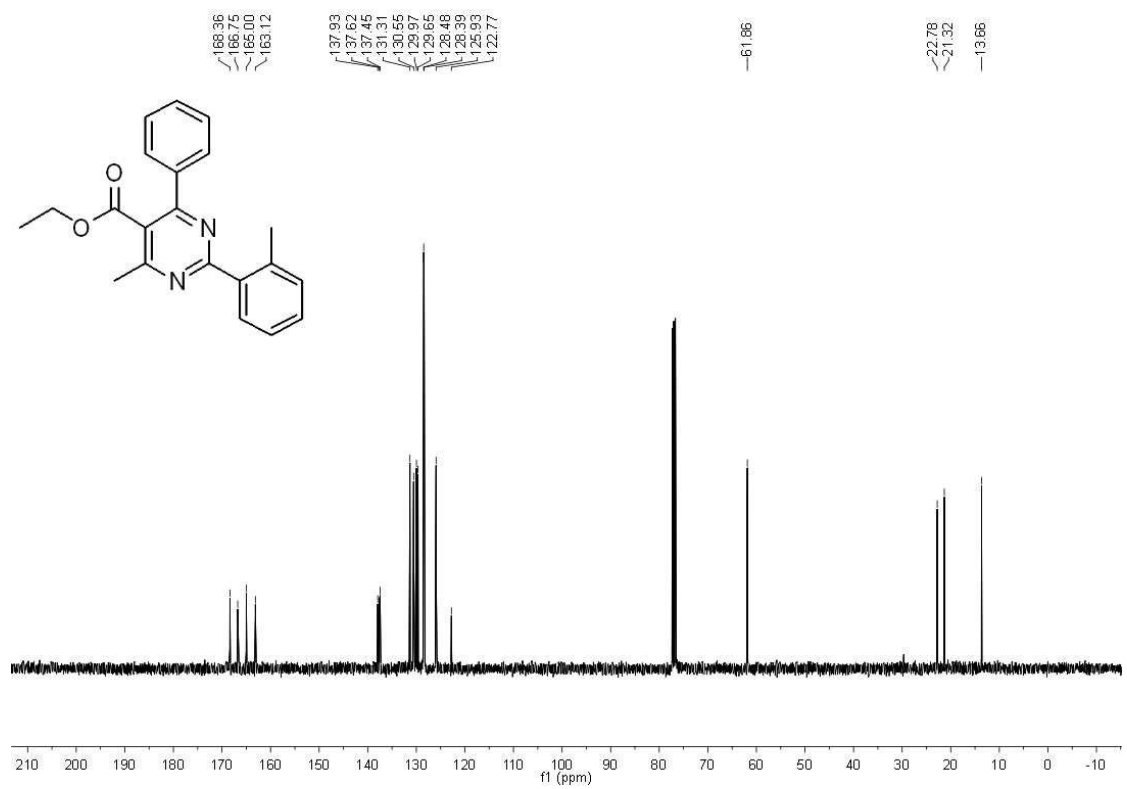

**<sup>1</sup>H and <sup>13</sup>C Spectra of compound 3e (CDCl<sub>3</sub>, 400 MHz)**

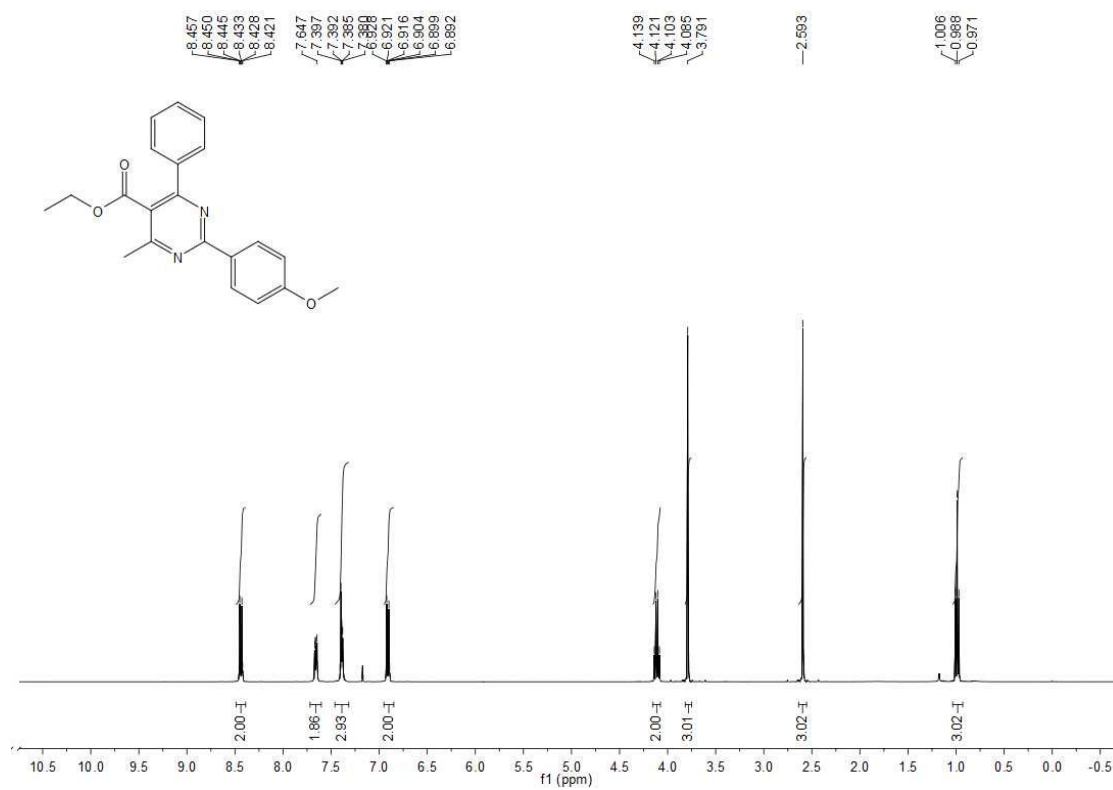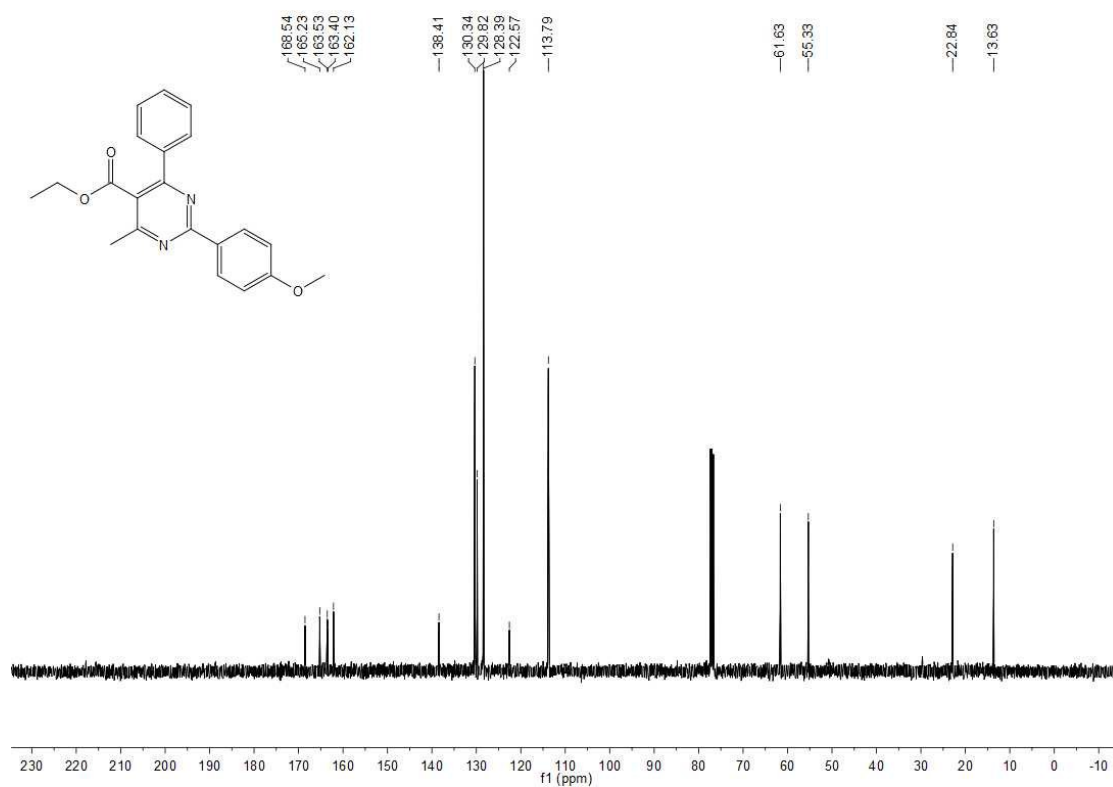

**<sup>1</sup>H and <sup>13</sup>C Spectra of compound 3f (CDCl<sub>3</sub>, 400 MHz)**

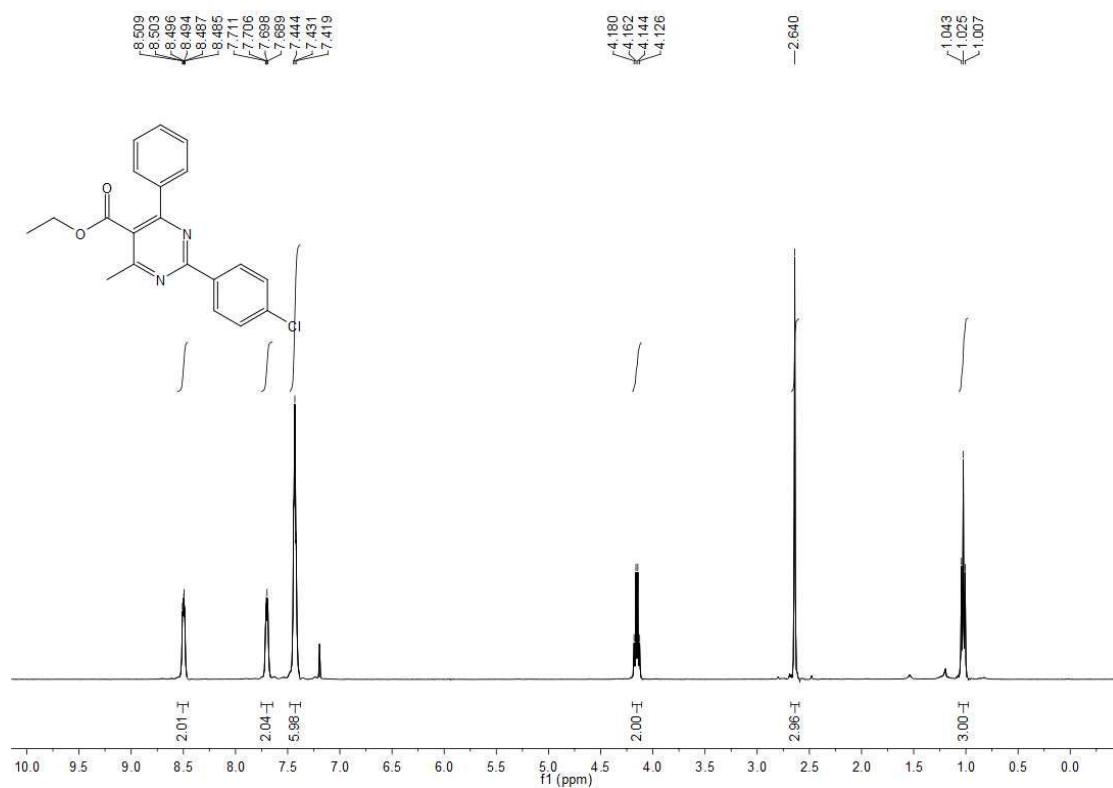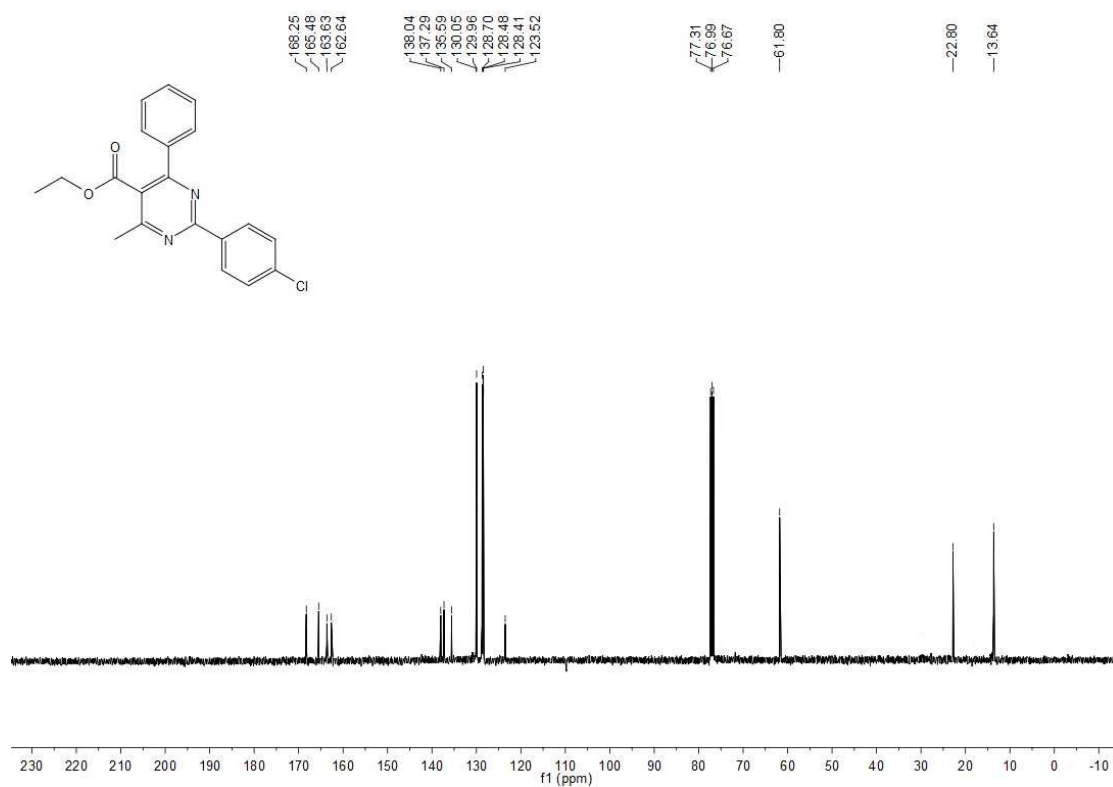

<sup>1</sup>H and <sup>13</sup>C Spectra of compound 3g (CDCl<sub>3</sub>, 400 MHz)

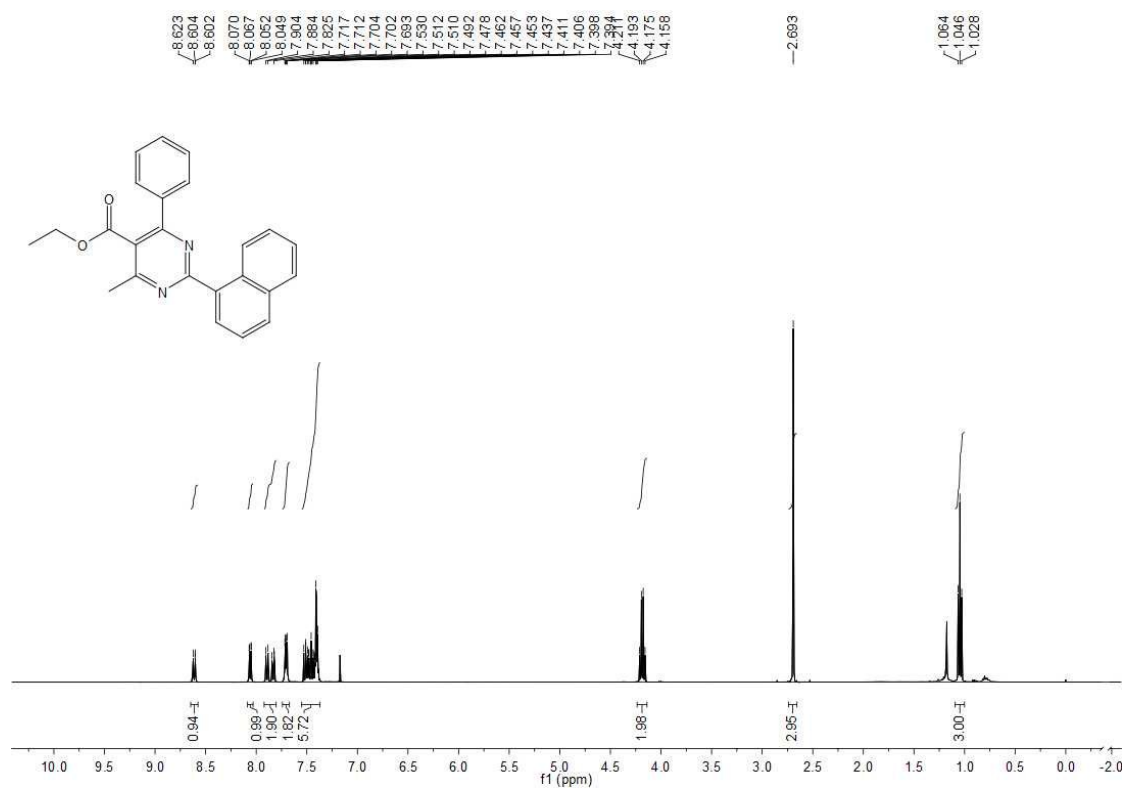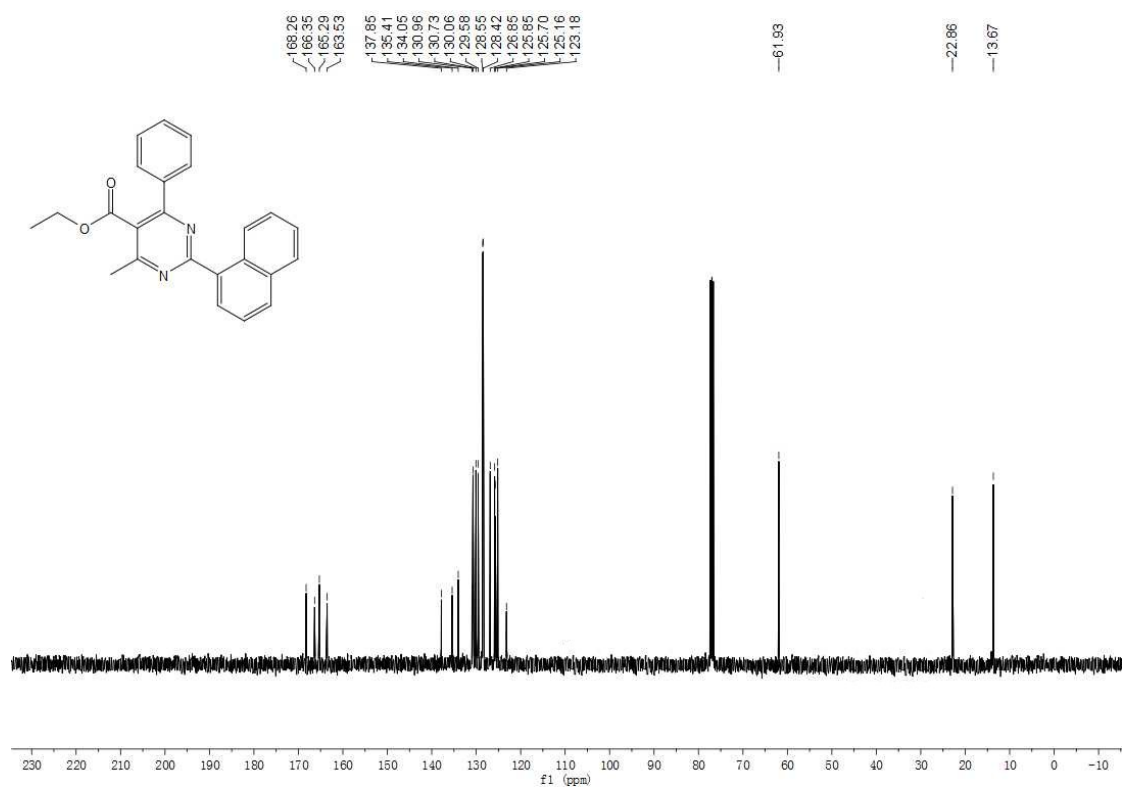



**<sup>1</sup>H and <sup>13</sup>C Spectra of compound 3h (CDCl<sub>3</sub>, 400 MHz)**

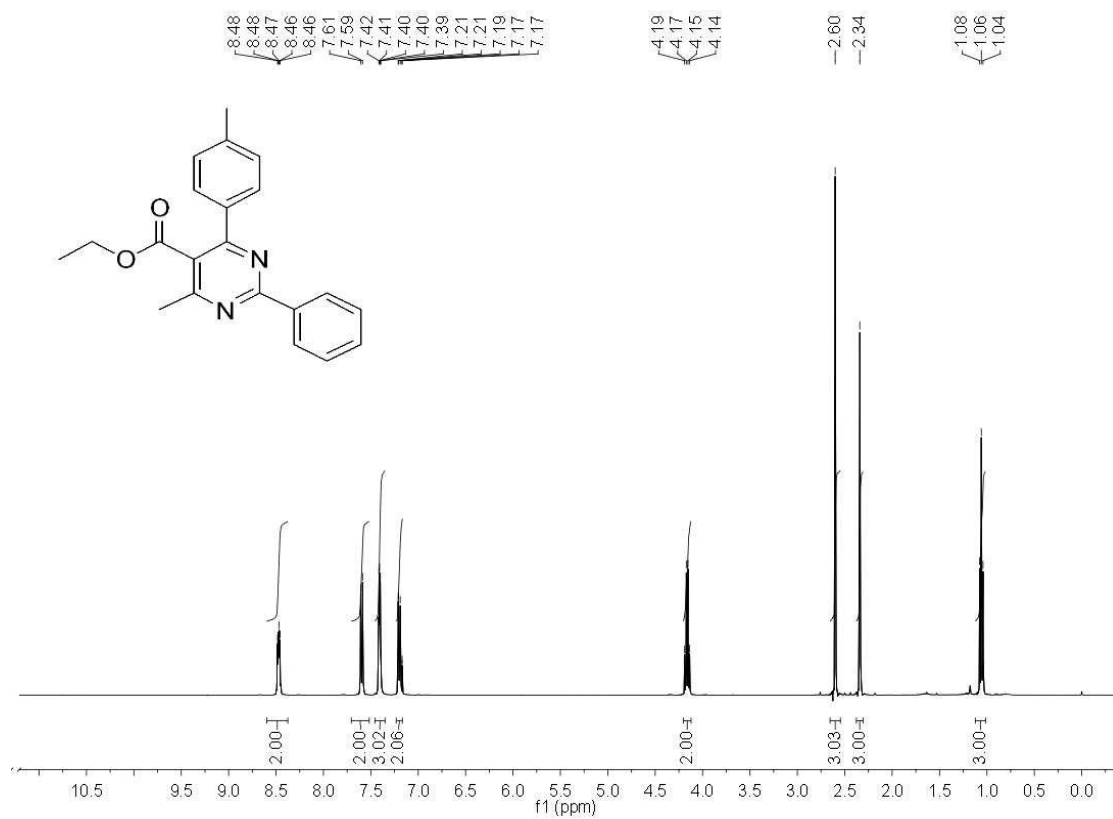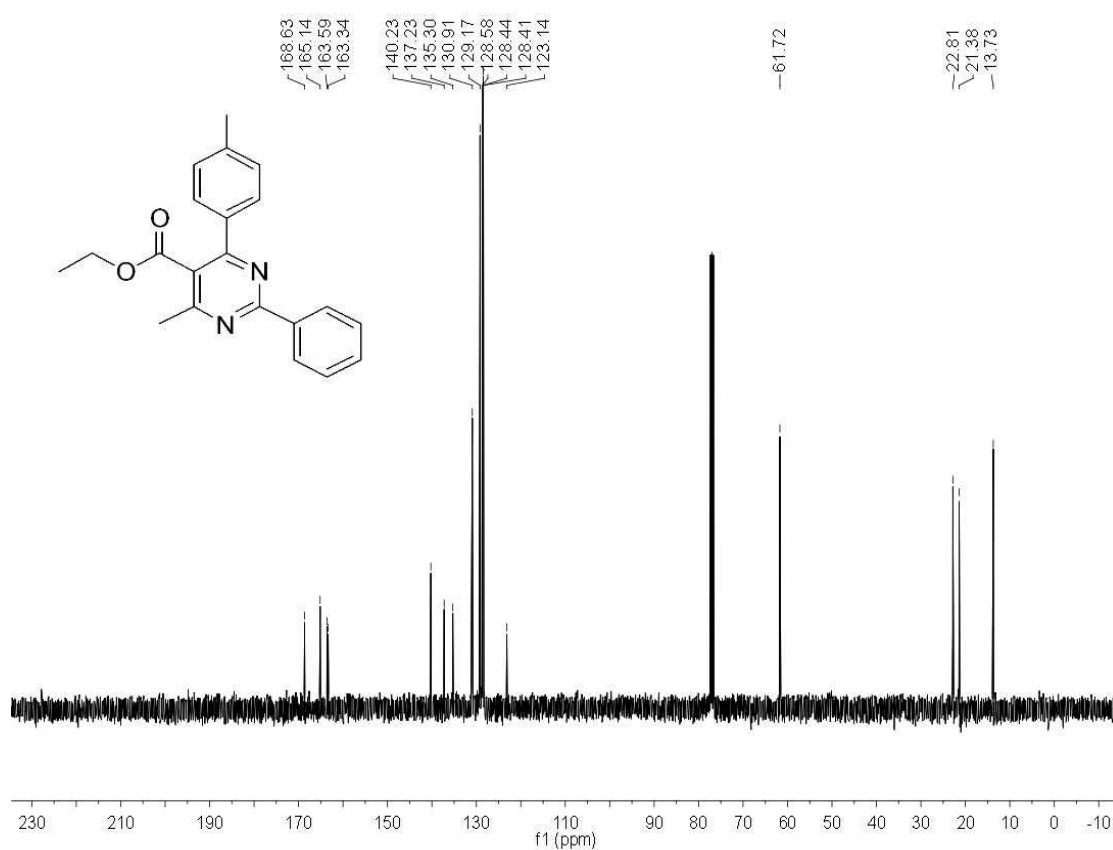

**<sup>1</sup>H and <sup>13</sup>C Spectra of compound 3i (CDCl<sub>3</sub>, 400 MHz)**

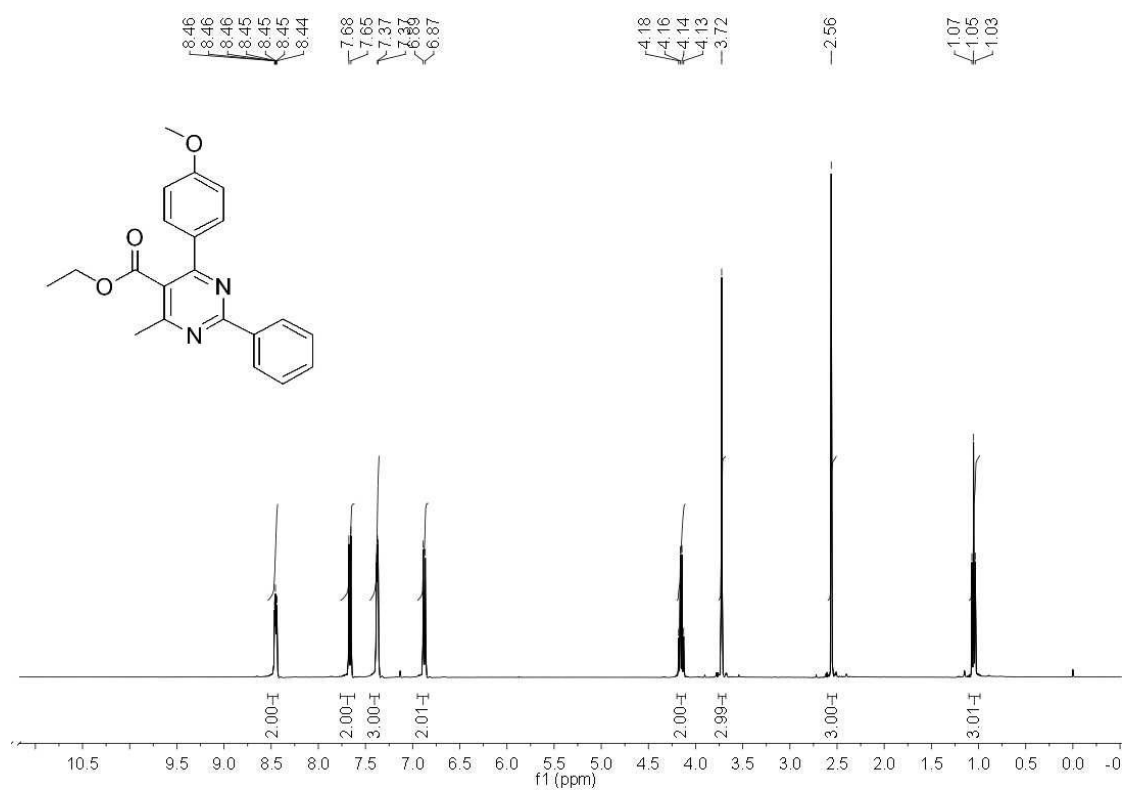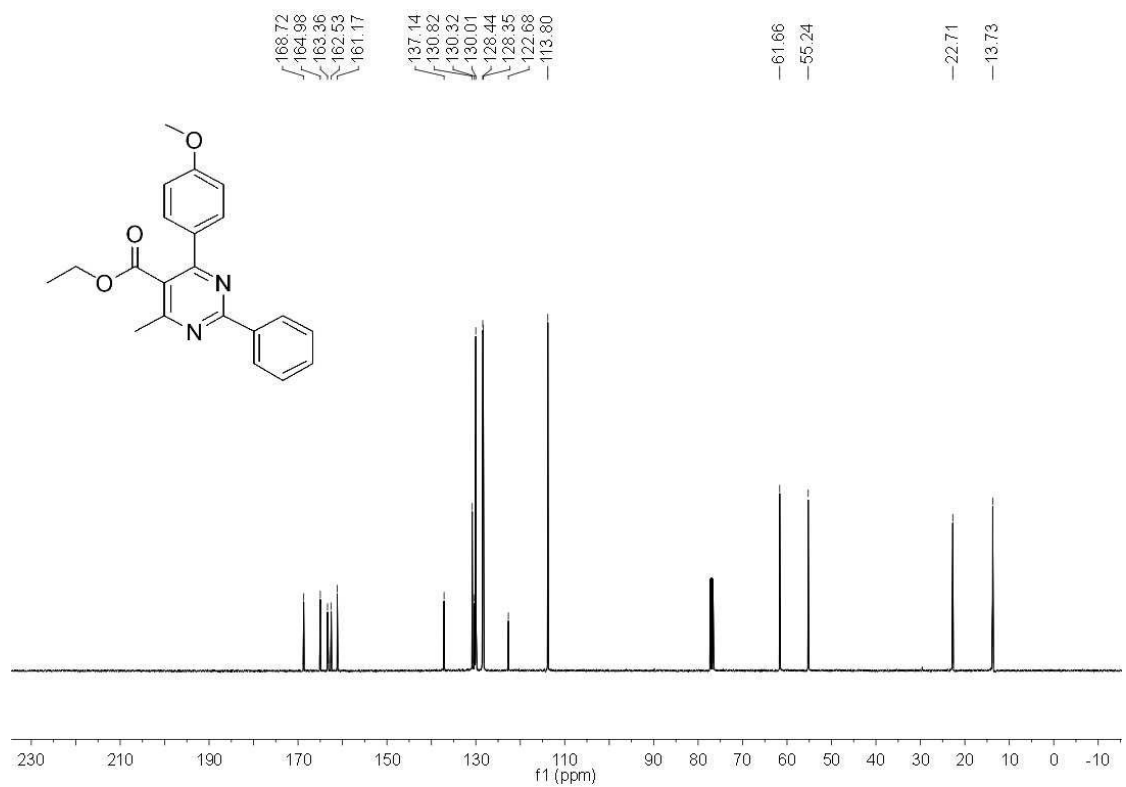

**<sup>1</sup>H and <sup>13</sup>C Spectra of compound 3j (CDCl<sub>3</sub>, 400 MHz)**

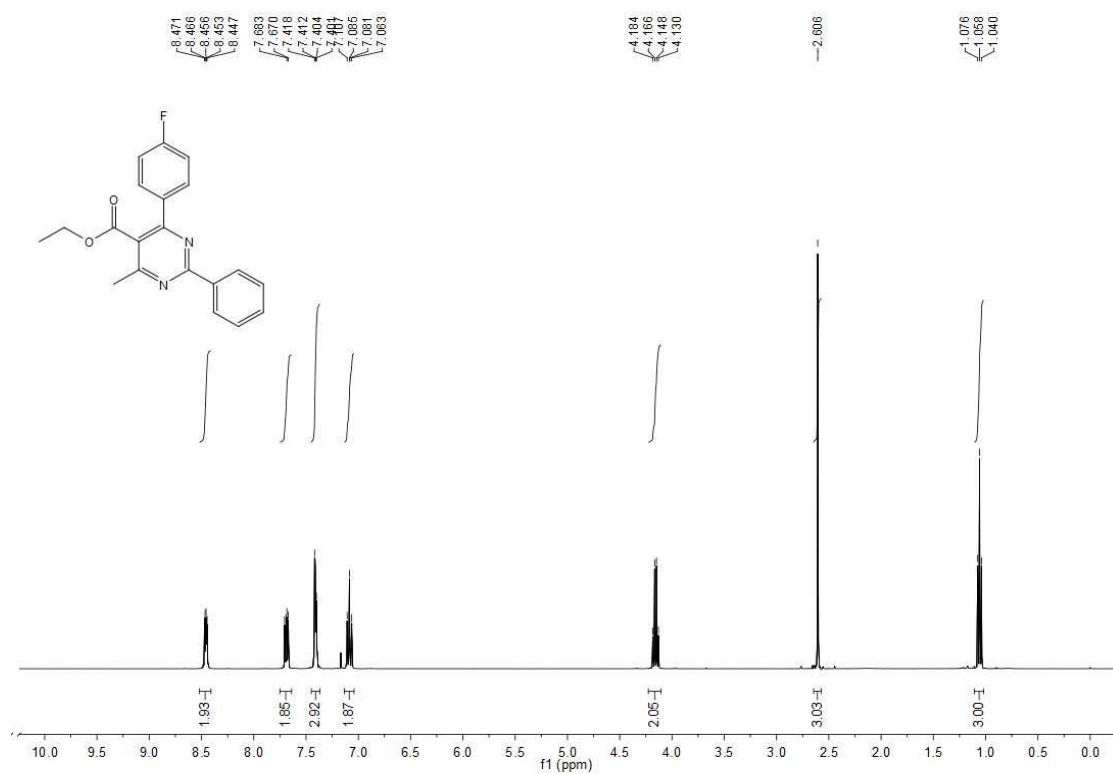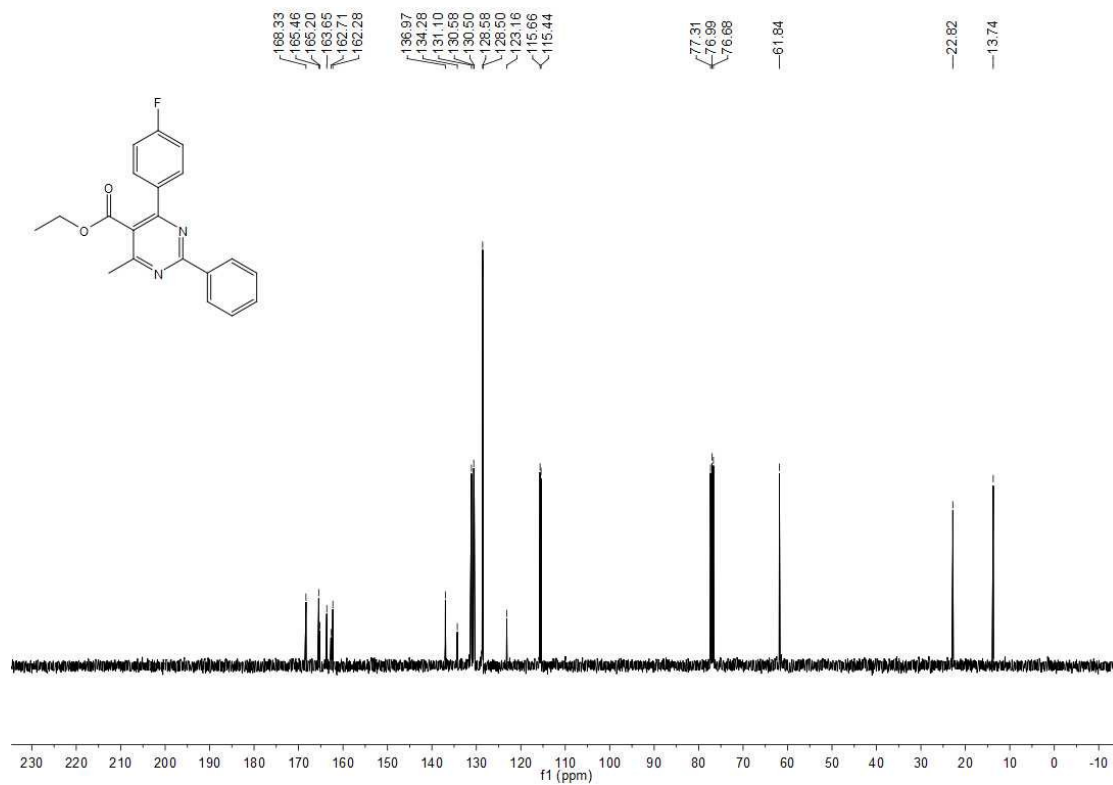

**<sup>1</sup>H and <sup>13</sup>C Spectra of compound 3k (CDCl<sub>3</sub>, 400 MHz)**

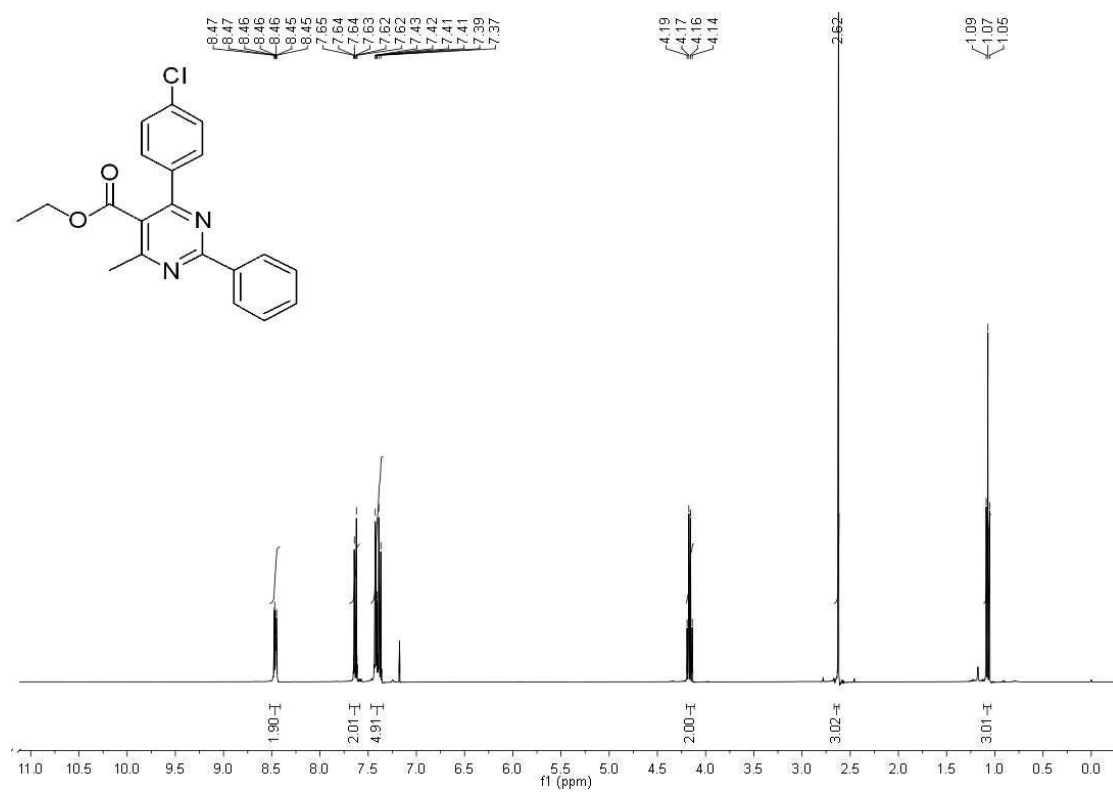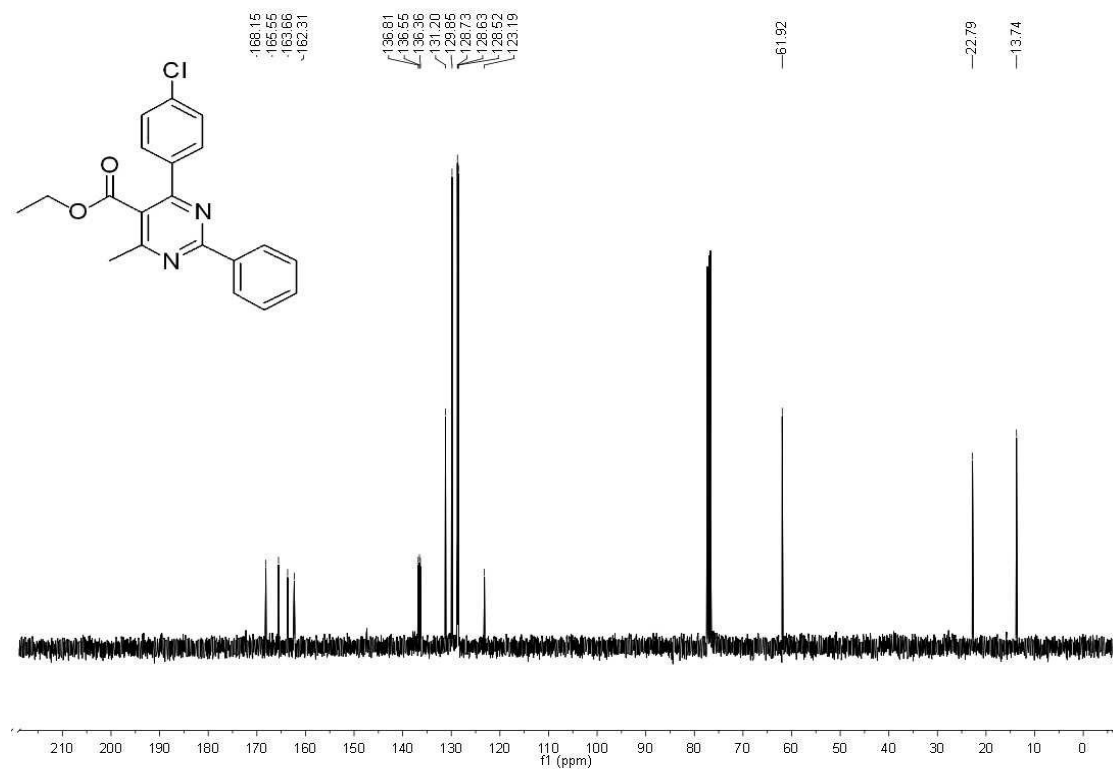

**<sup>1</sup>H and <sup>13</sup>C Spectra of compound 31 (CDCl<sub>3</sub>, 400 MHz)**

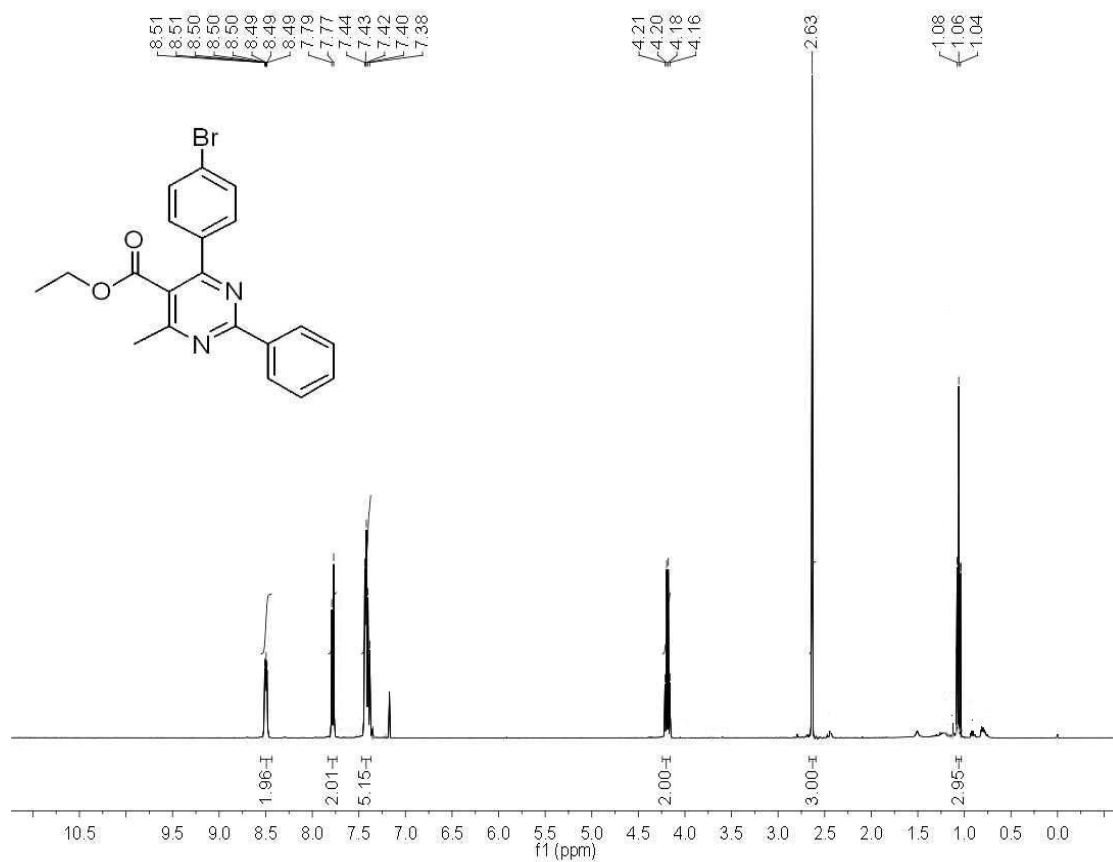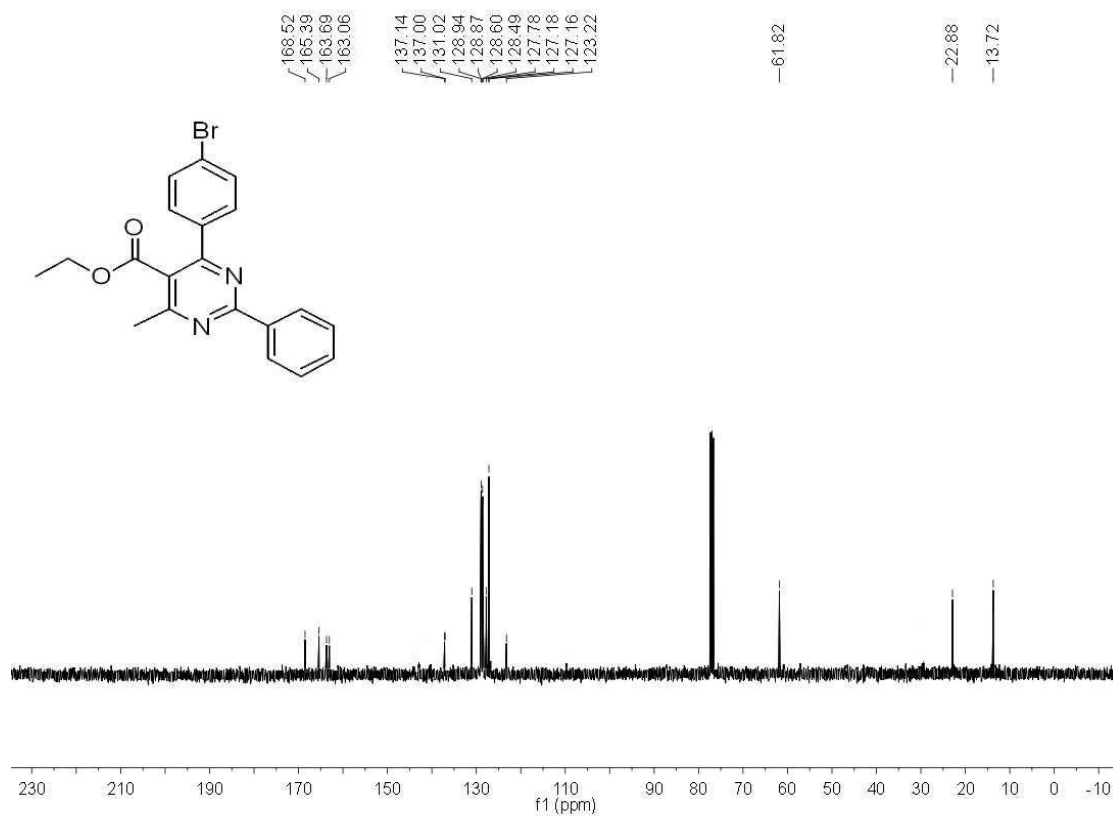

**<sup>1</sup>H and <sup>13</sup>C Spectra of compound 5a (CDCl<sub>3</sub>, 400 MHz)**

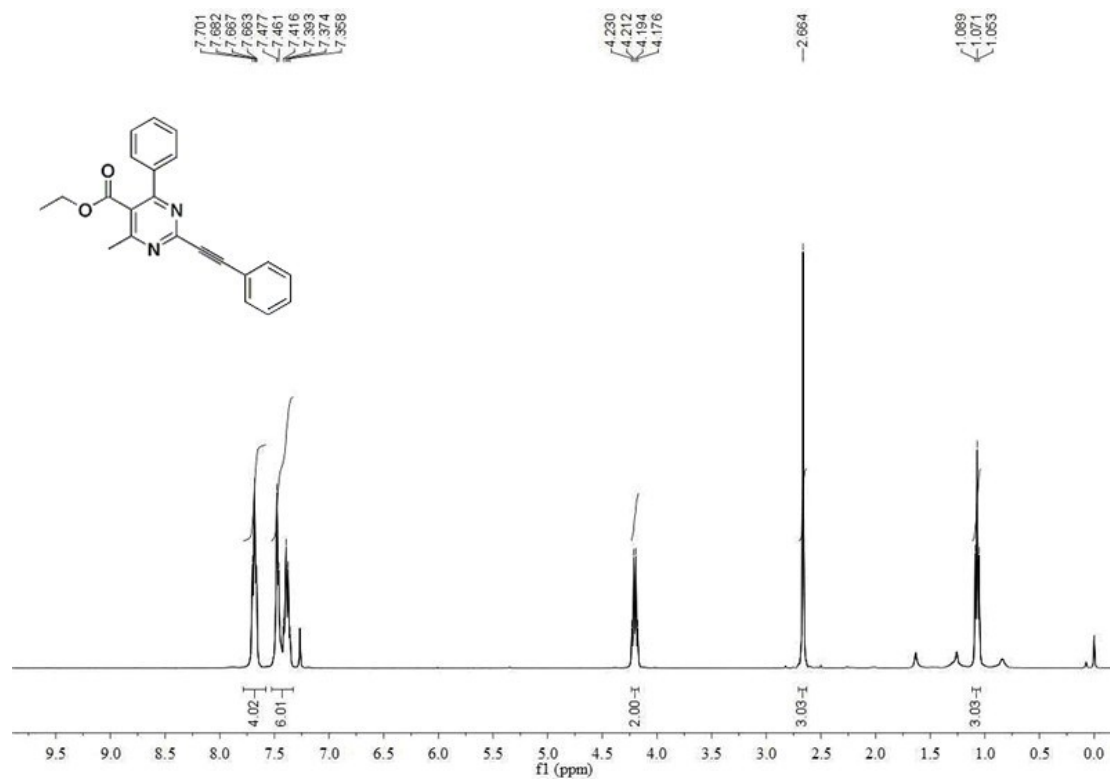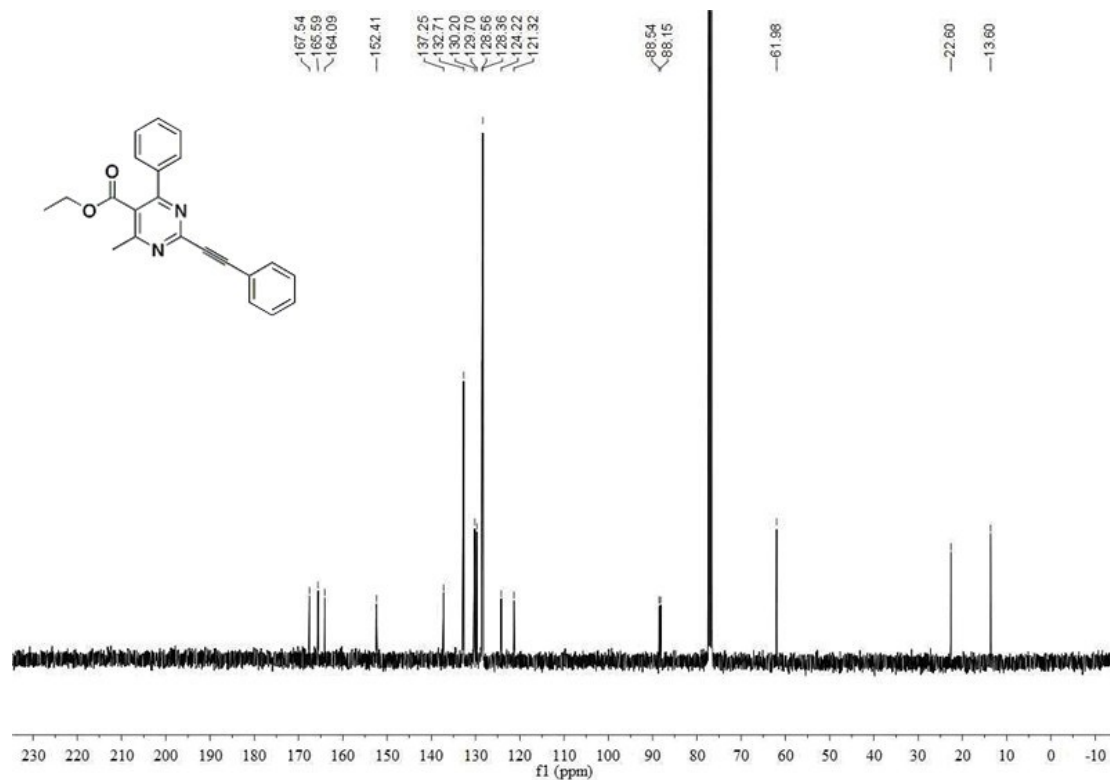

**<sup>1</sup>H and <sup>13</sup>C Spectra of compound 5b (CDCl<sub>3</sub>, 400 MHz)**

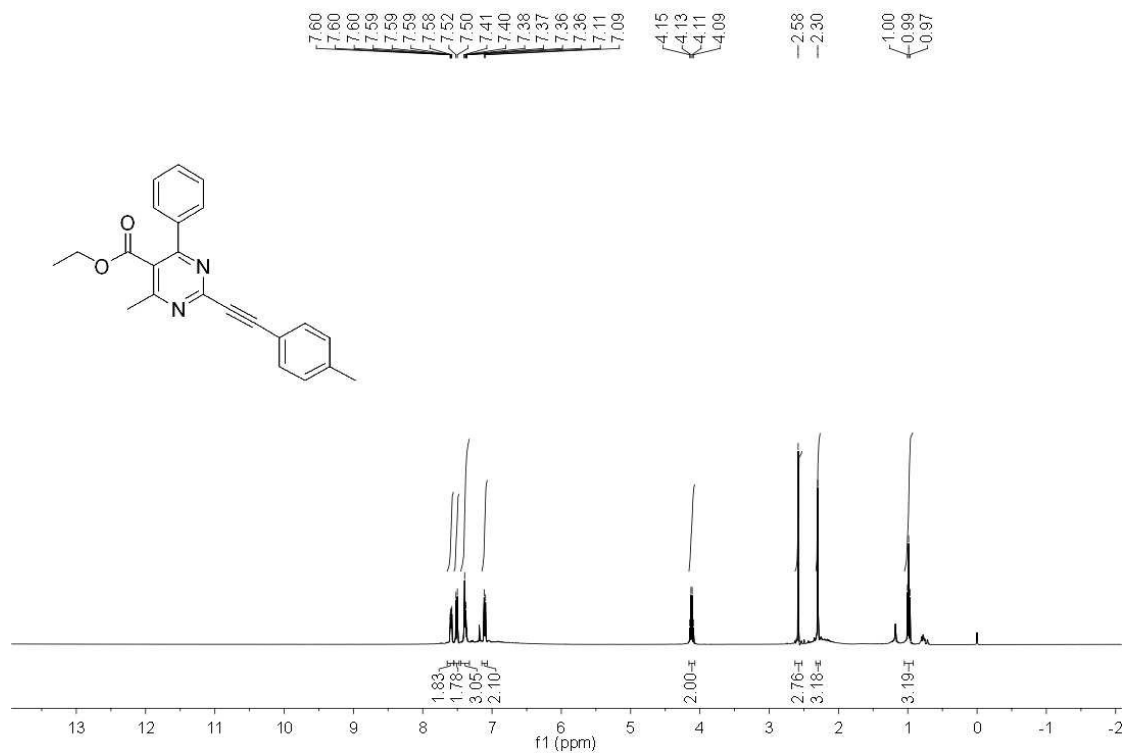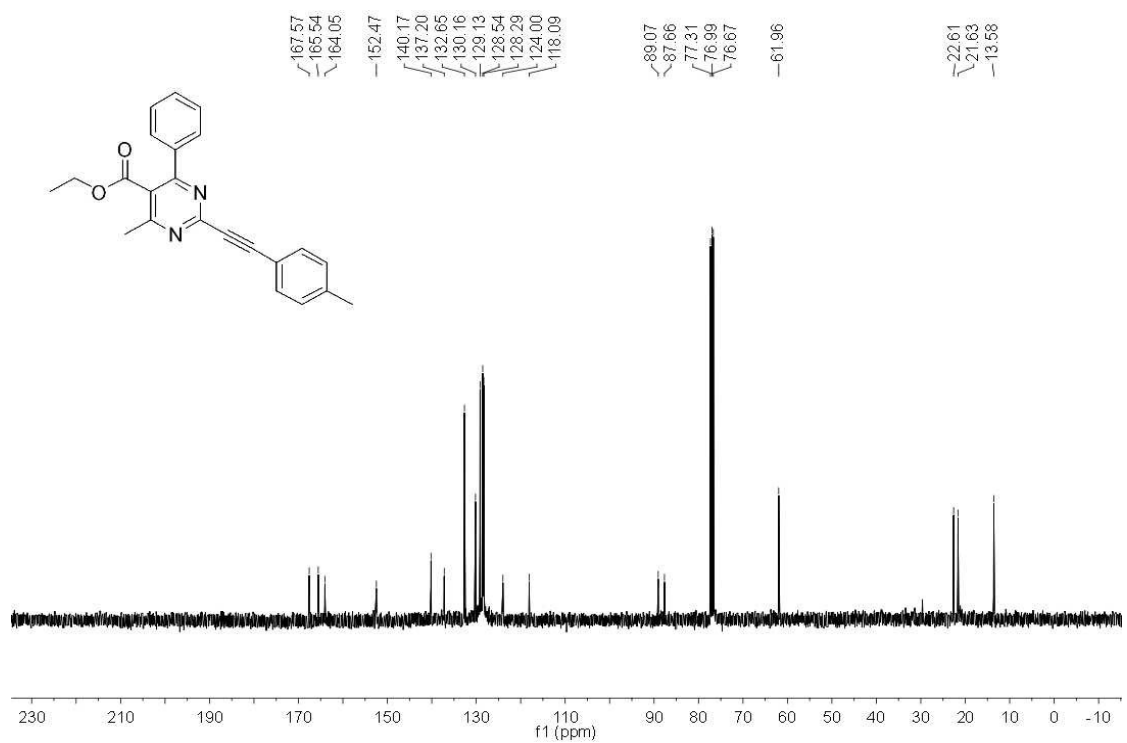

**<sup>1</sup>H and <sup>13</sup>C Spectra of compound 5c (CDCl<sub>3</sub>, 400 MHz)**

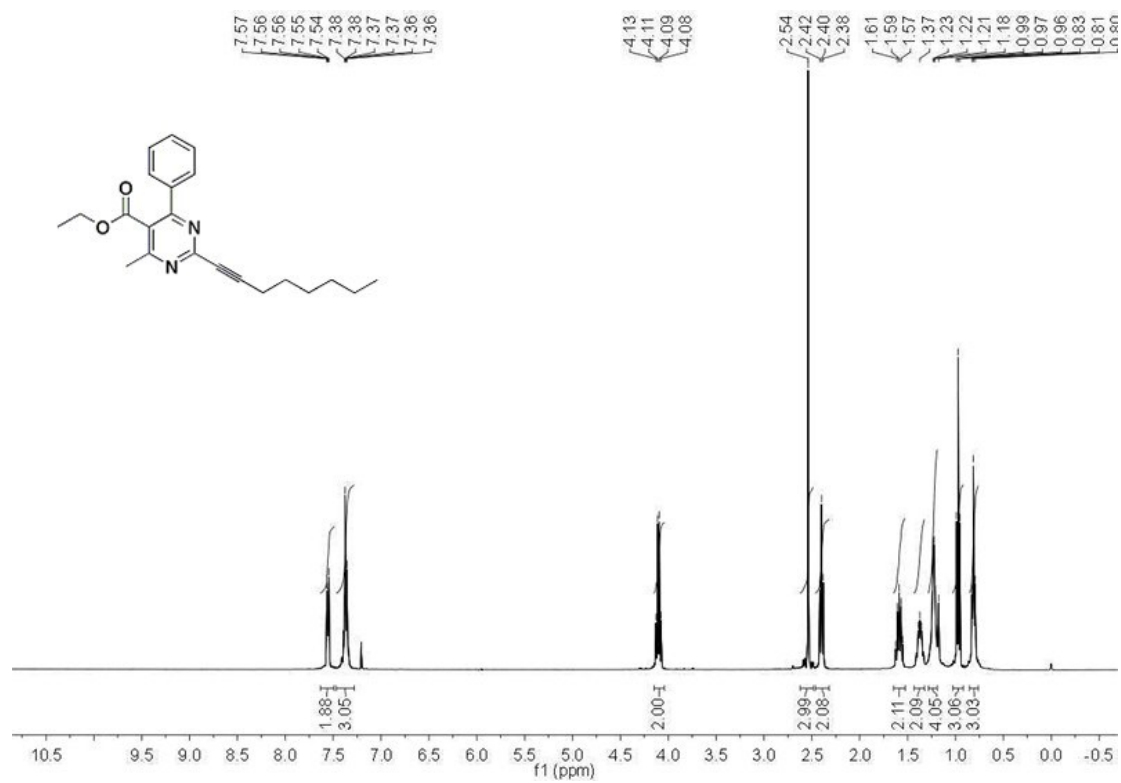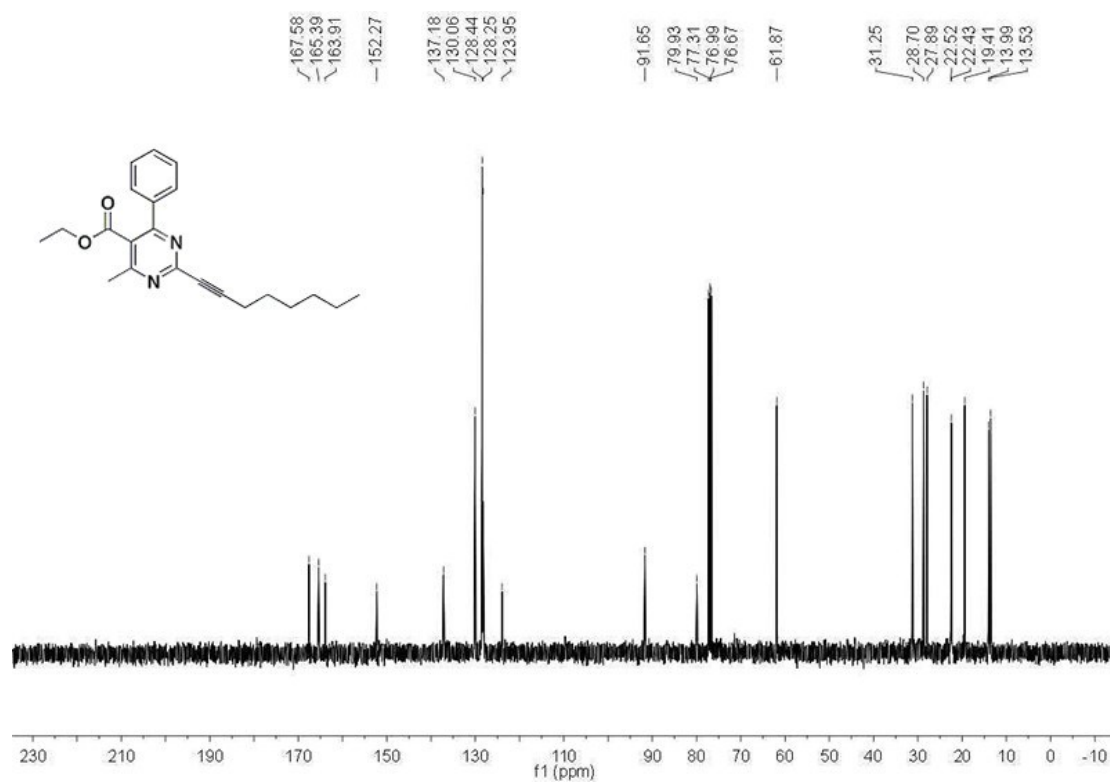



**<sup>1</sup>H and <sup>13</sup>C Spectra of compound 5d (CDCl<sub>3</sub>, 400 MHz)**

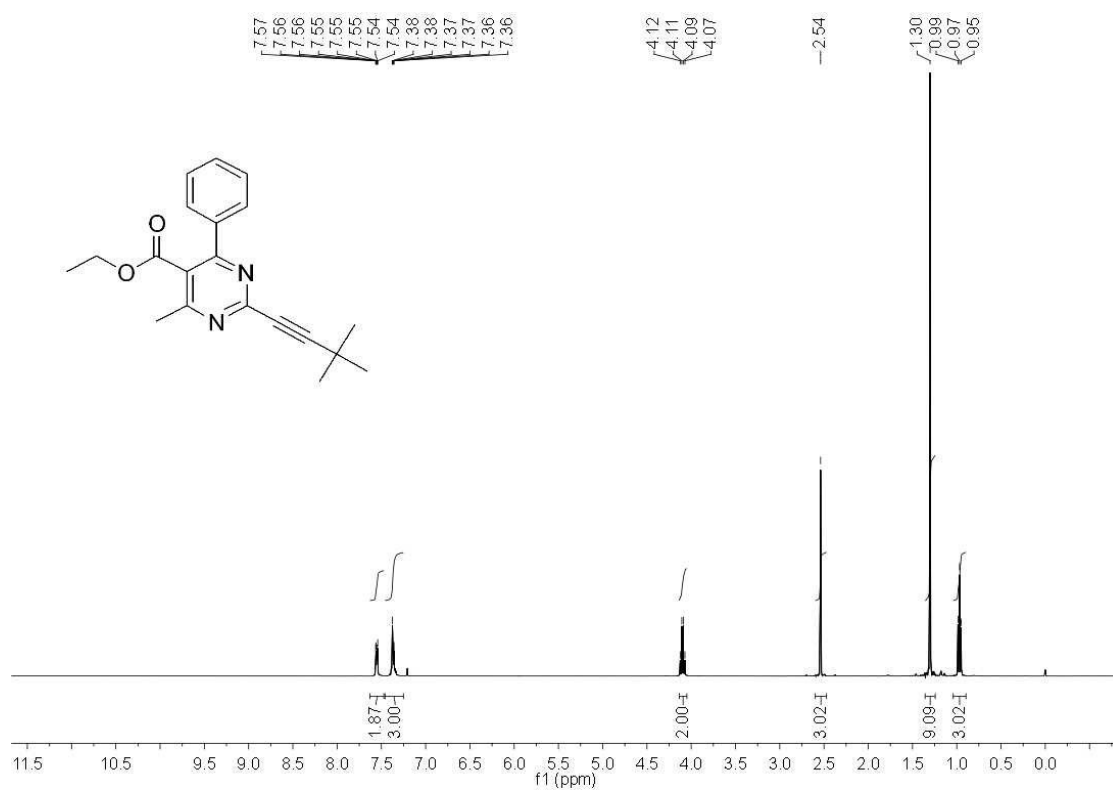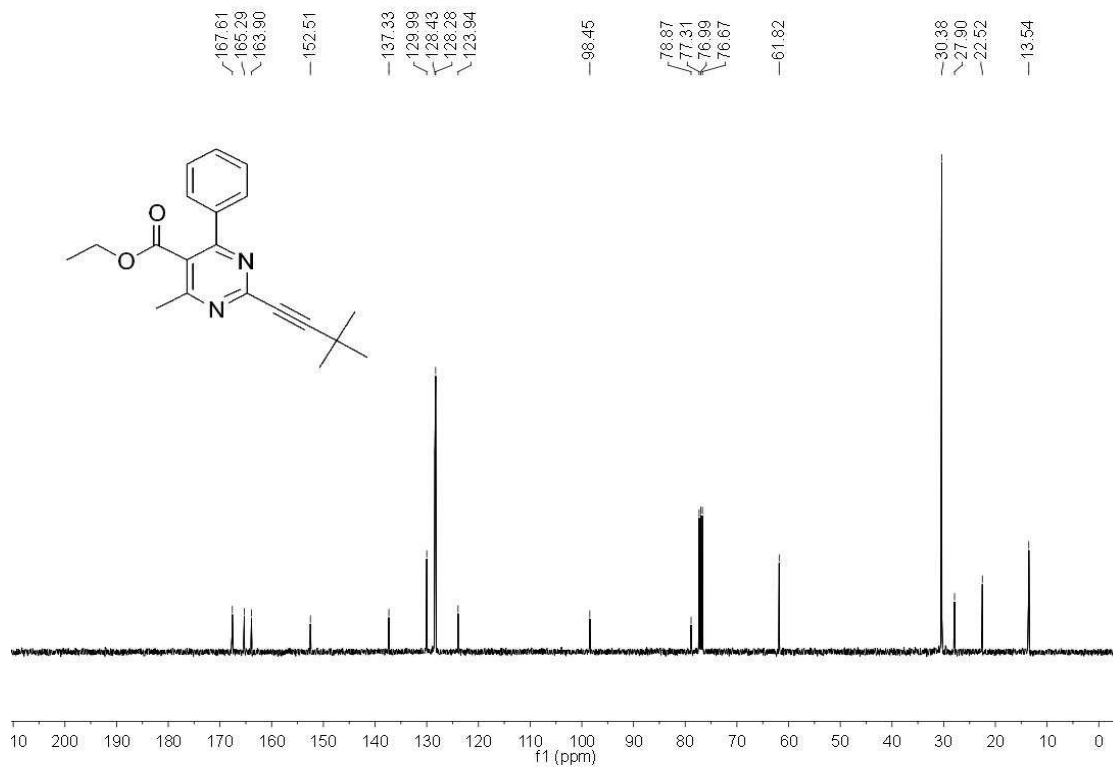

**<sup>1</sup>H and <sup>13</sup>C Spectra of compound 5e (CDCl<sub>3</sub>, 400 MHz)**

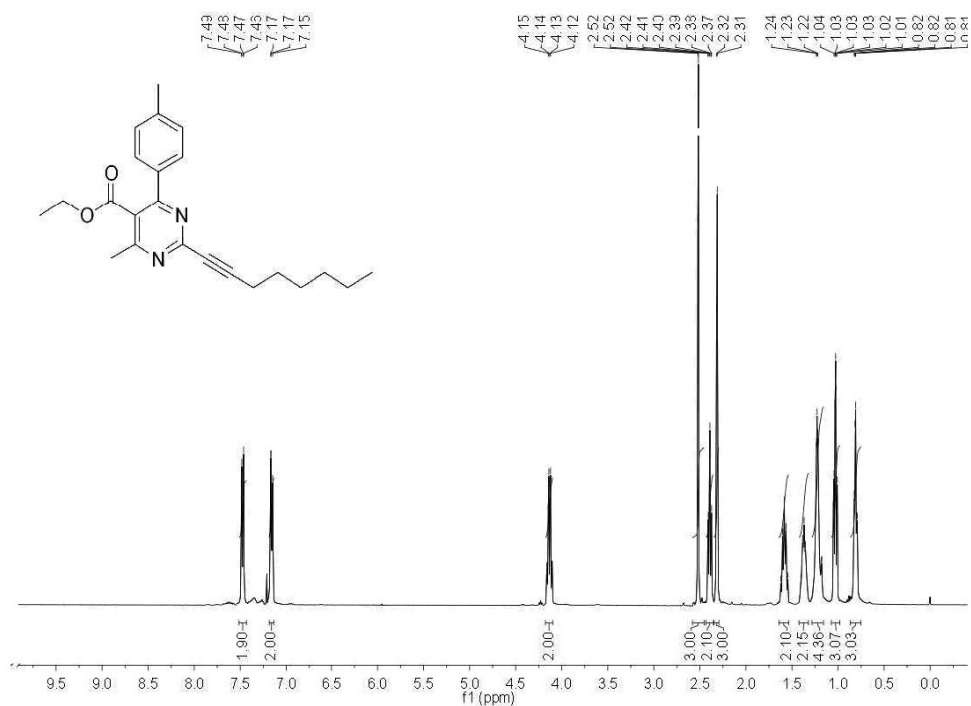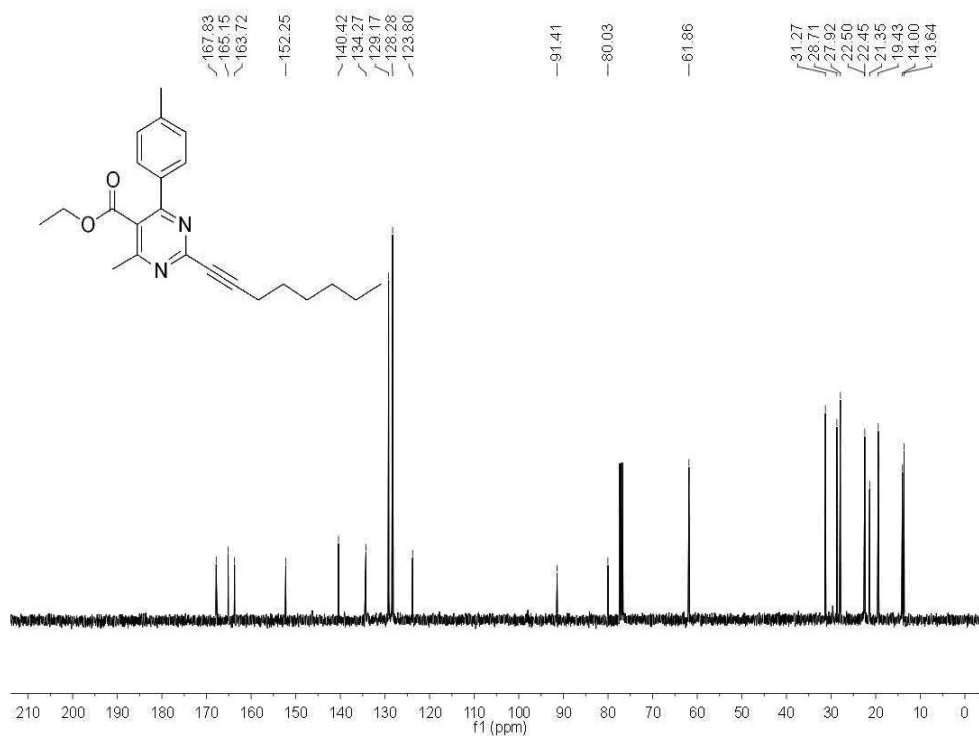

<sup>1</sup>H and <sup>13</sup>C Spectra of compound 5f (CDCl<sub>3</sub>, 400 MHz)

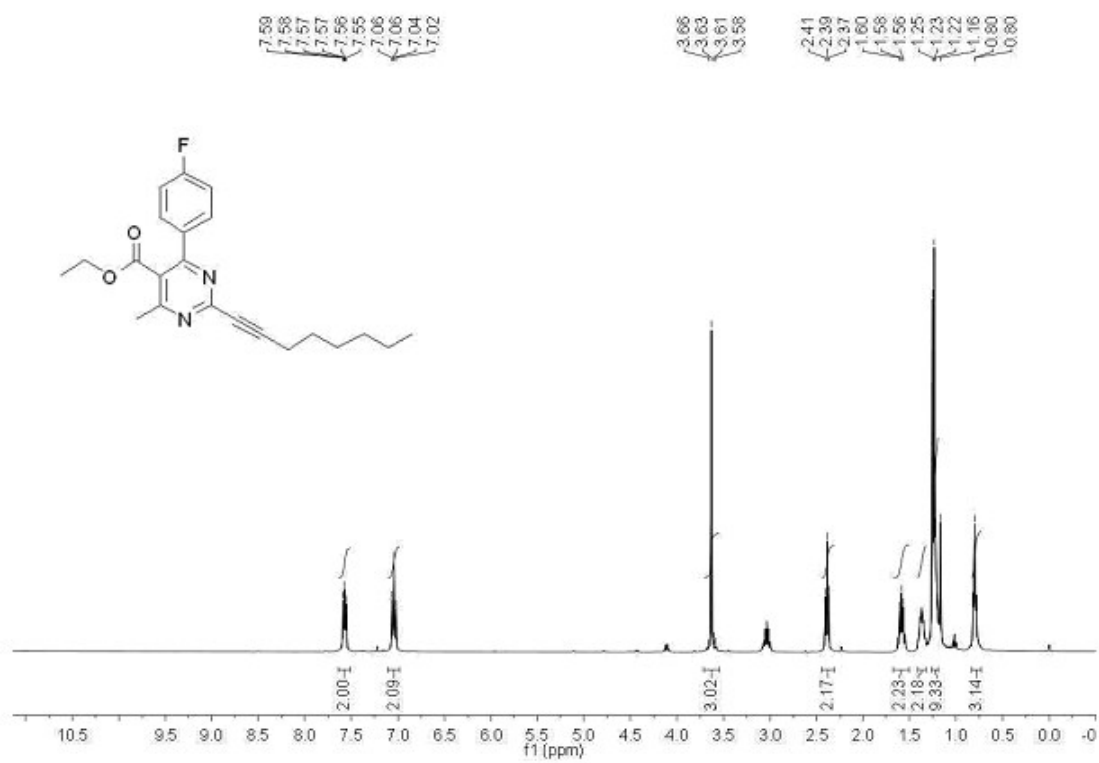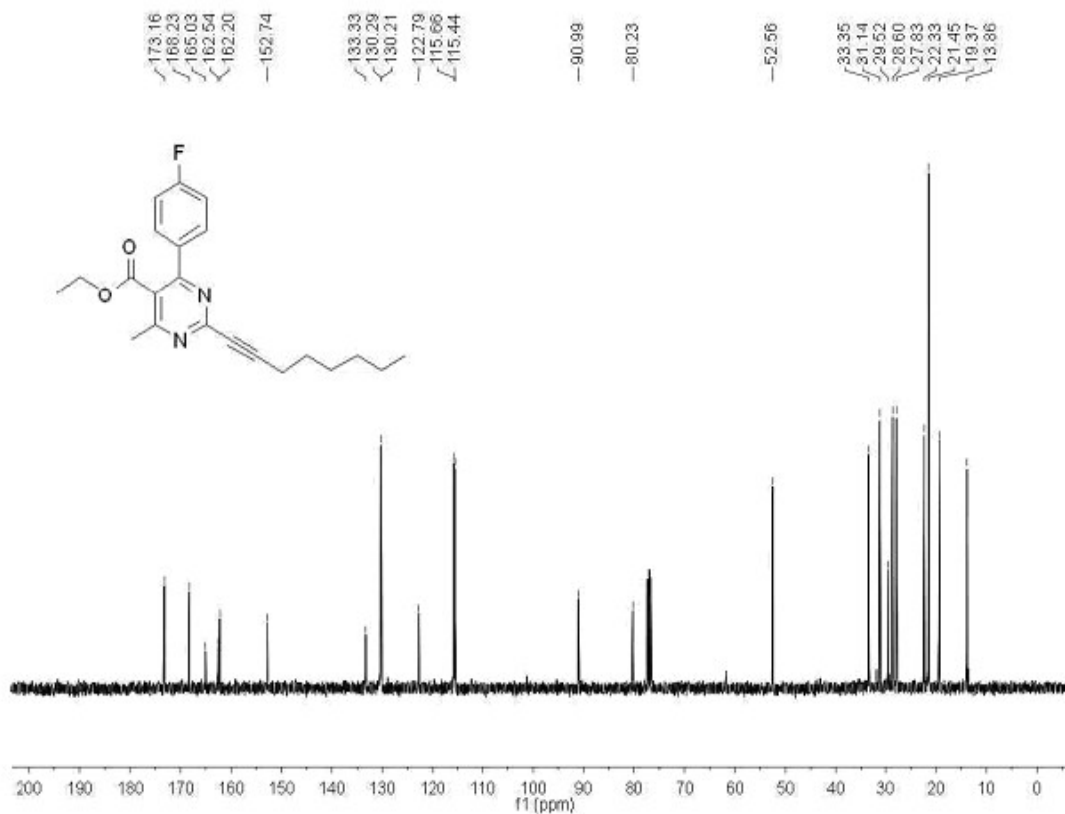



**<sup>1</sup>H and <sup>13</sup>C Spectra of compound 7a (CDCl<sub>3</sub>, 400 MHz)**

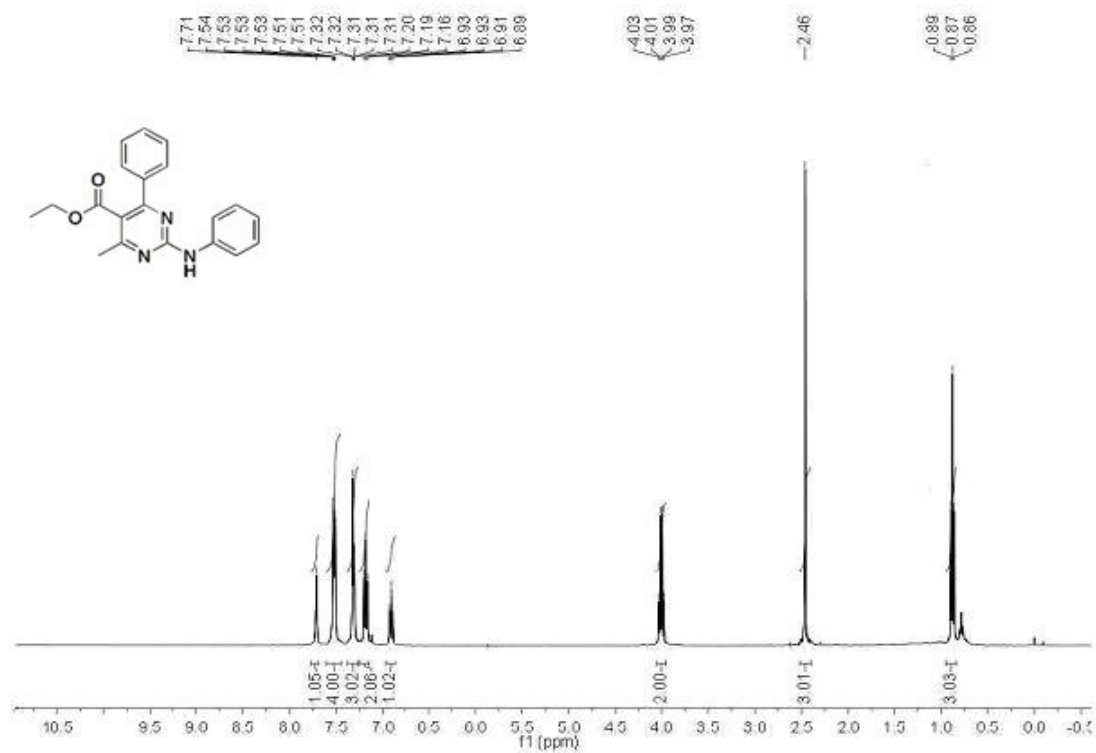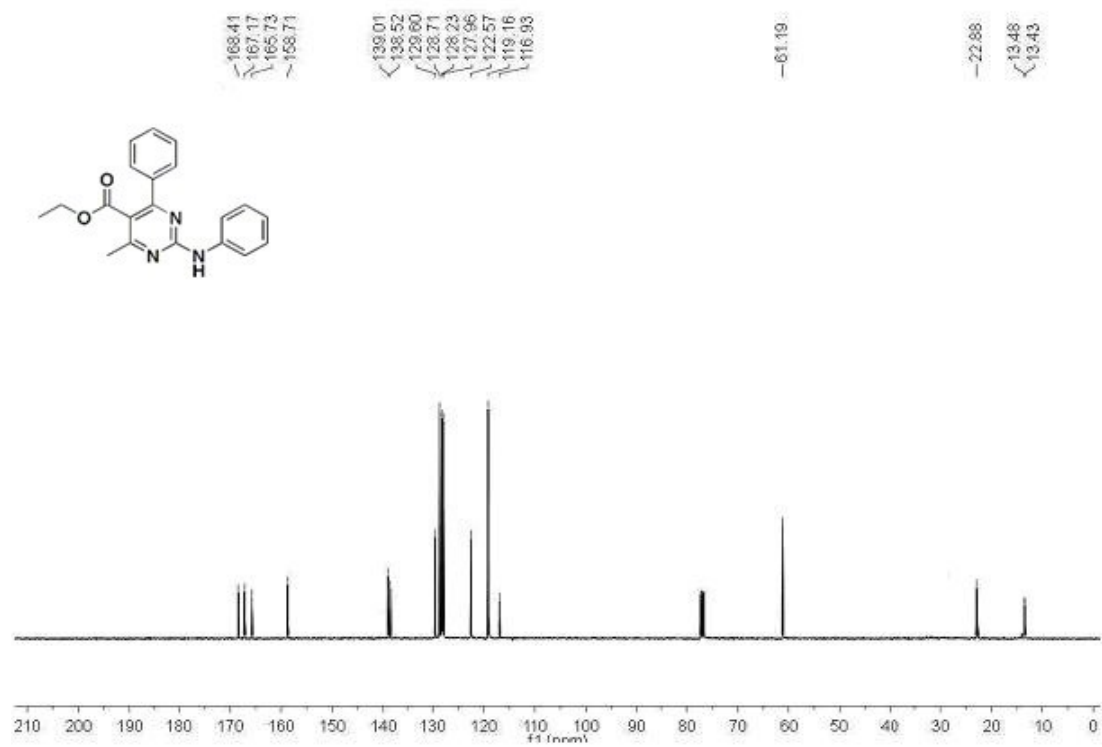

**<sup>1</sup>H and <sup>13</sup>C Spectra of compound 7b (CDCl<sub>3</sub>, 400 MHz)**

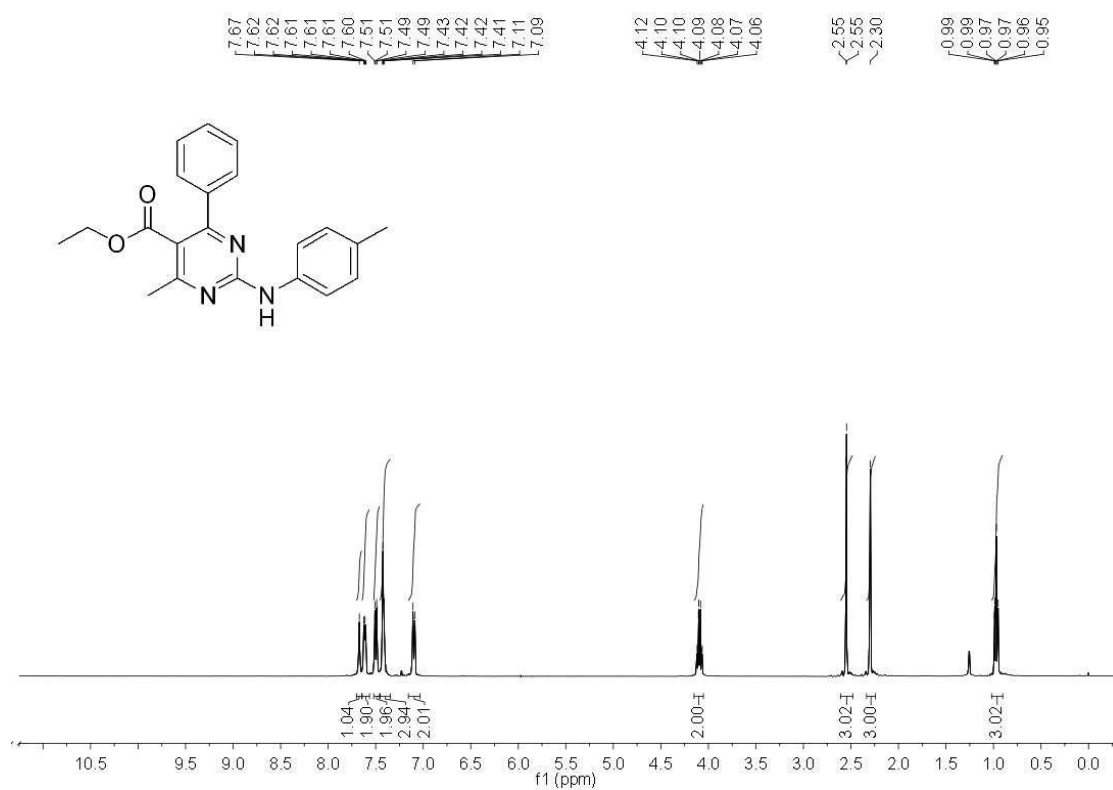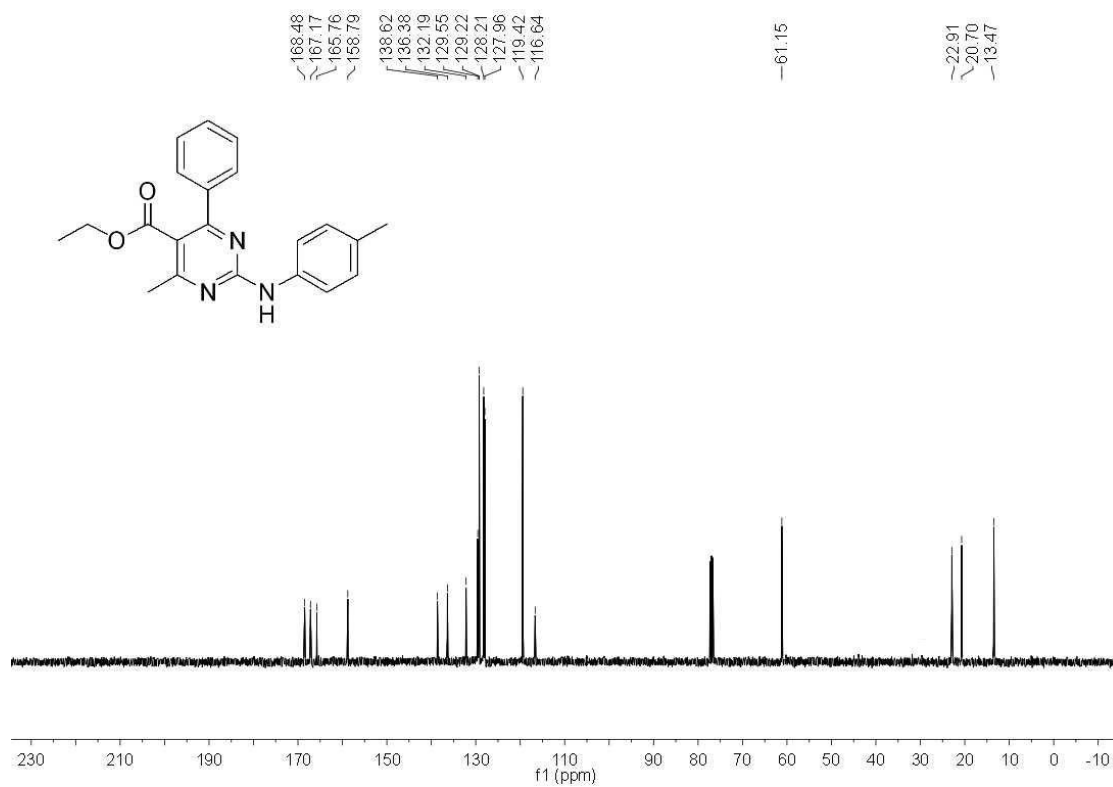

**<sup>1</sup>H and <sup>13</sup>C Spectra of compound 7c (CDCl<sub>3</sub>, 400 MHz)**

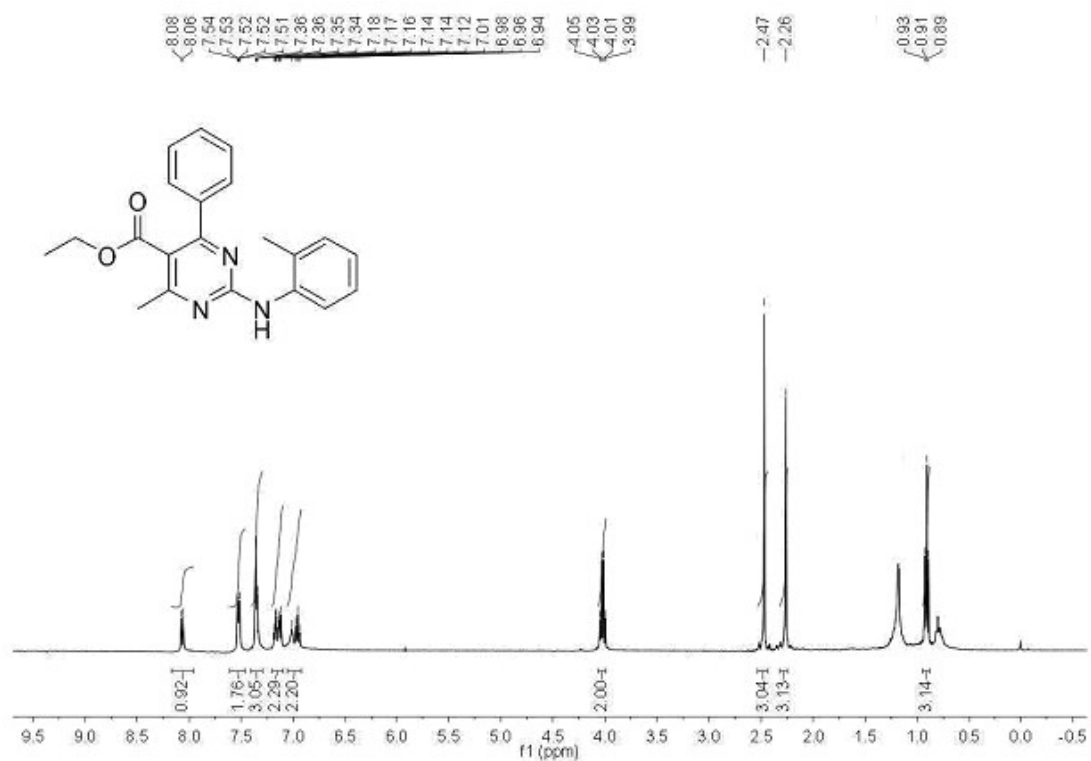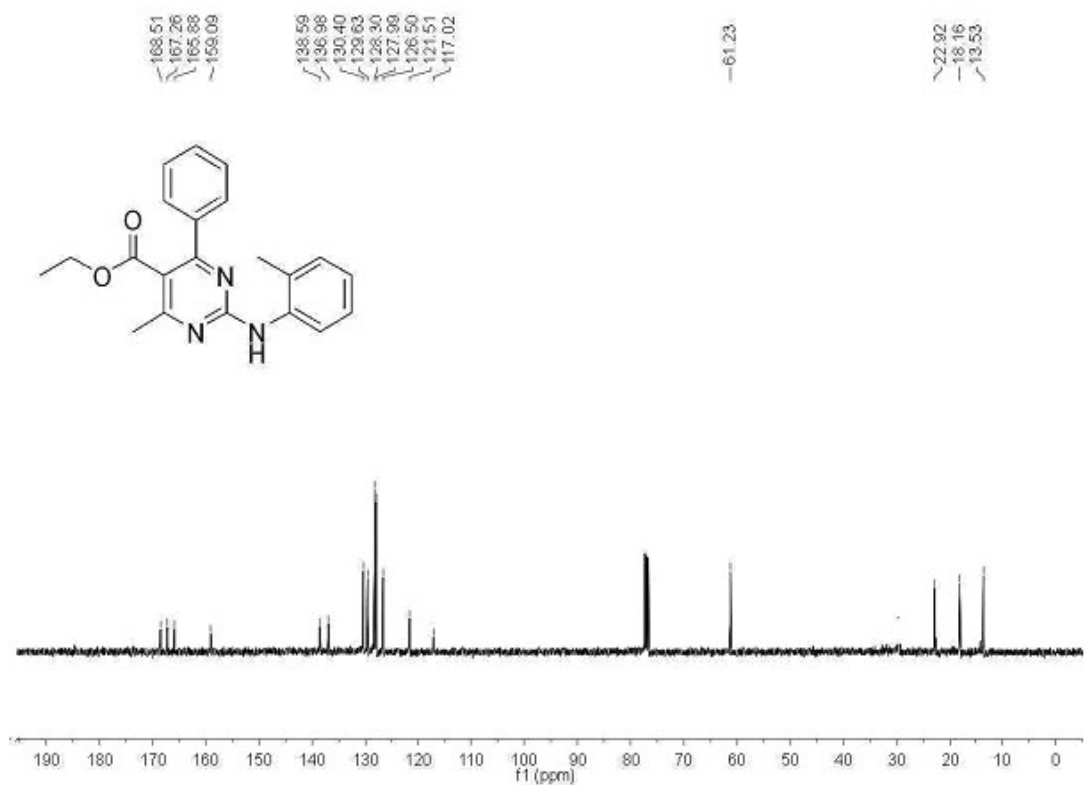

<sup>1</sup>H and <sup>13</sup>C Spectra of compound 7d (CDCl<sub>3</sub>, 400 MHz)

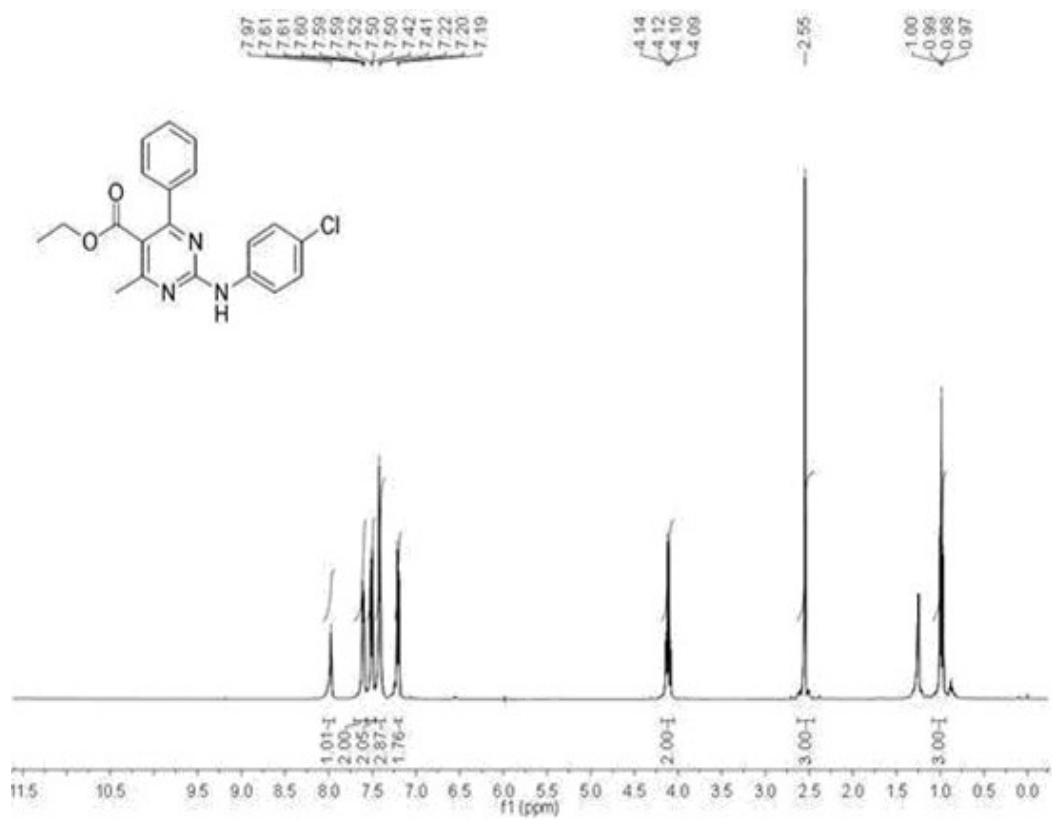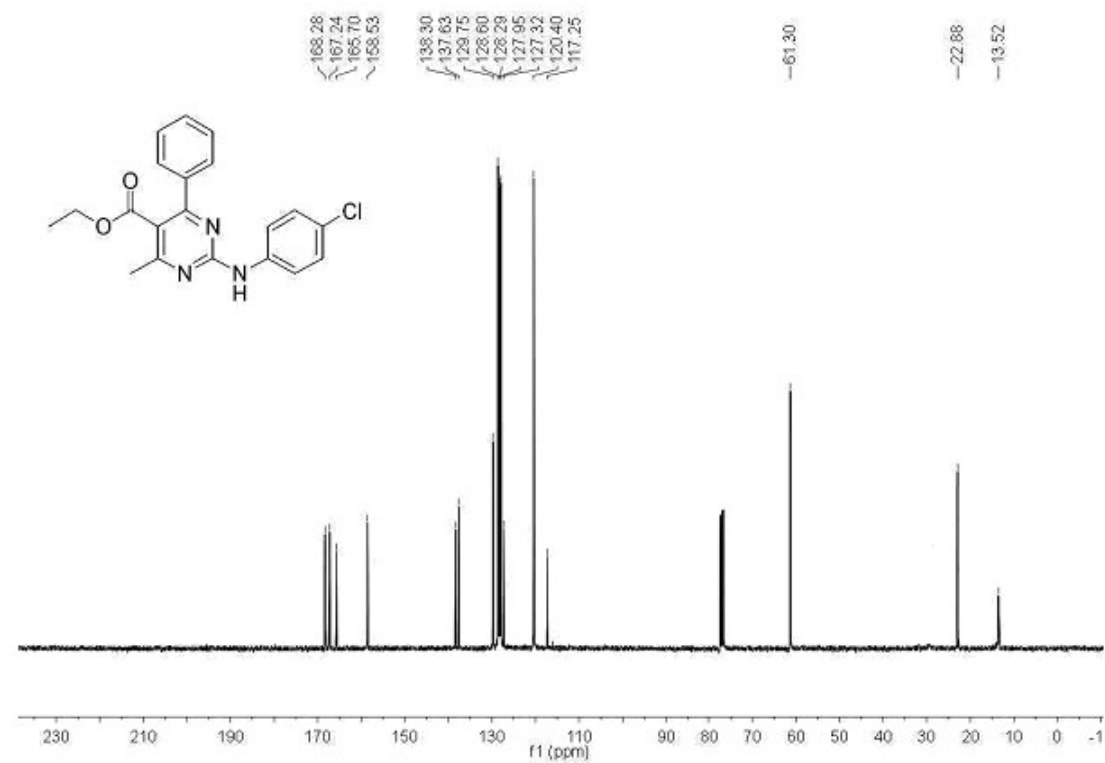



<sup>1</sup>H and <sup>13</sup>C Spectra of compound 7e (CDCl<sub>3</sub>, 400 MHz)

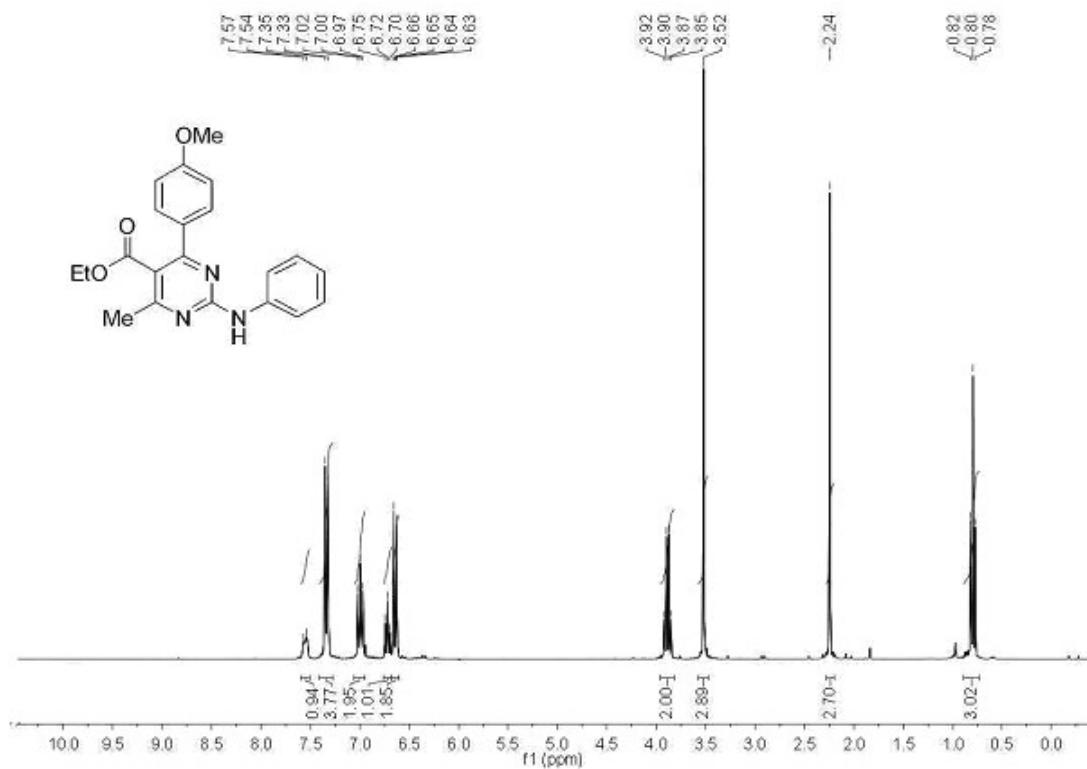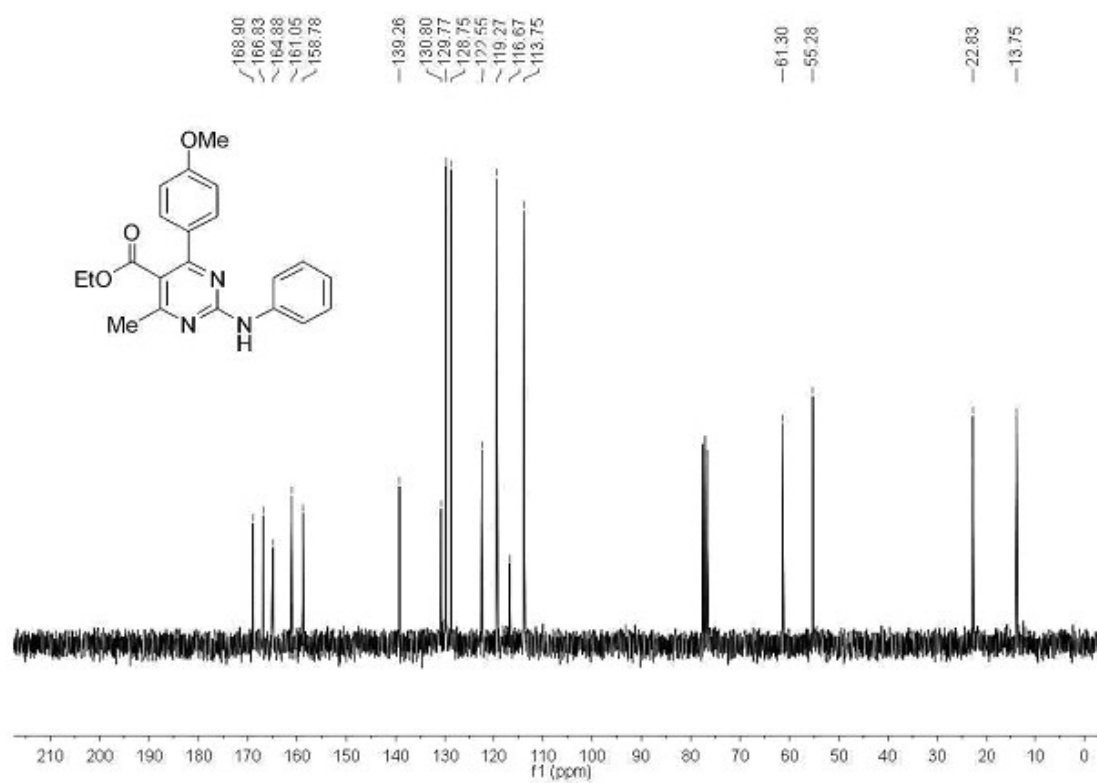

<sup>1</sup>H and <sup>13</sup>C Spectra of compound 7f (CDCl<sub>3</sub>, 400 MHz)

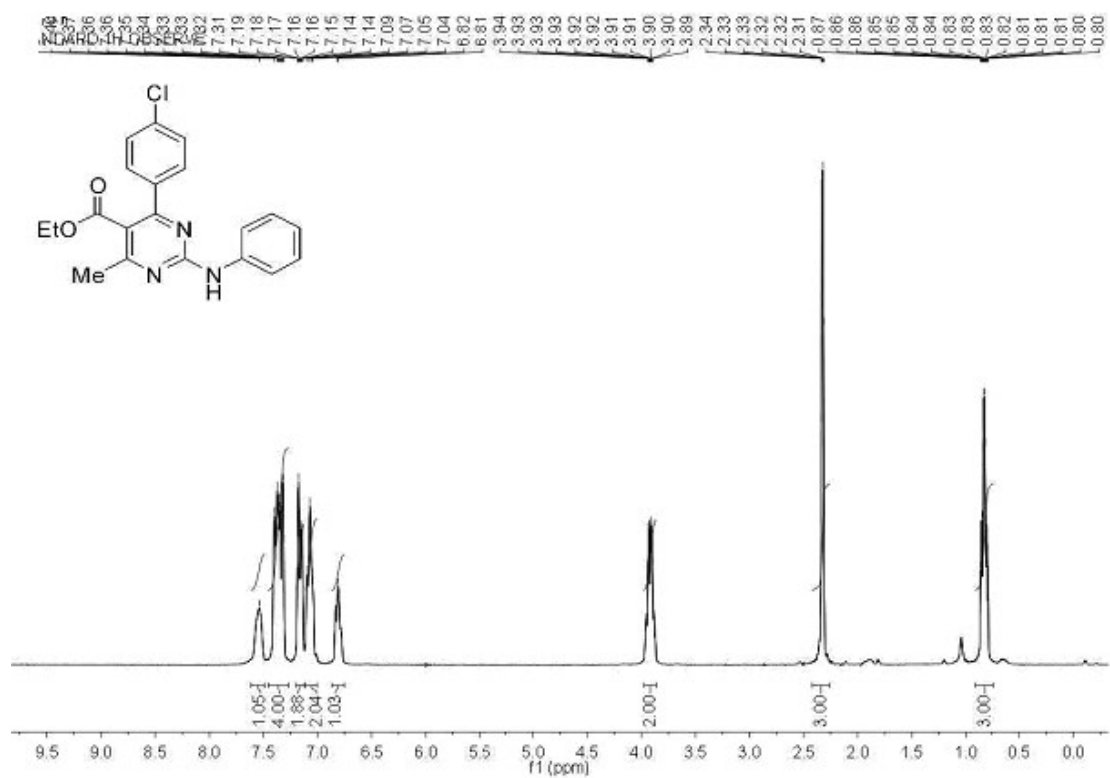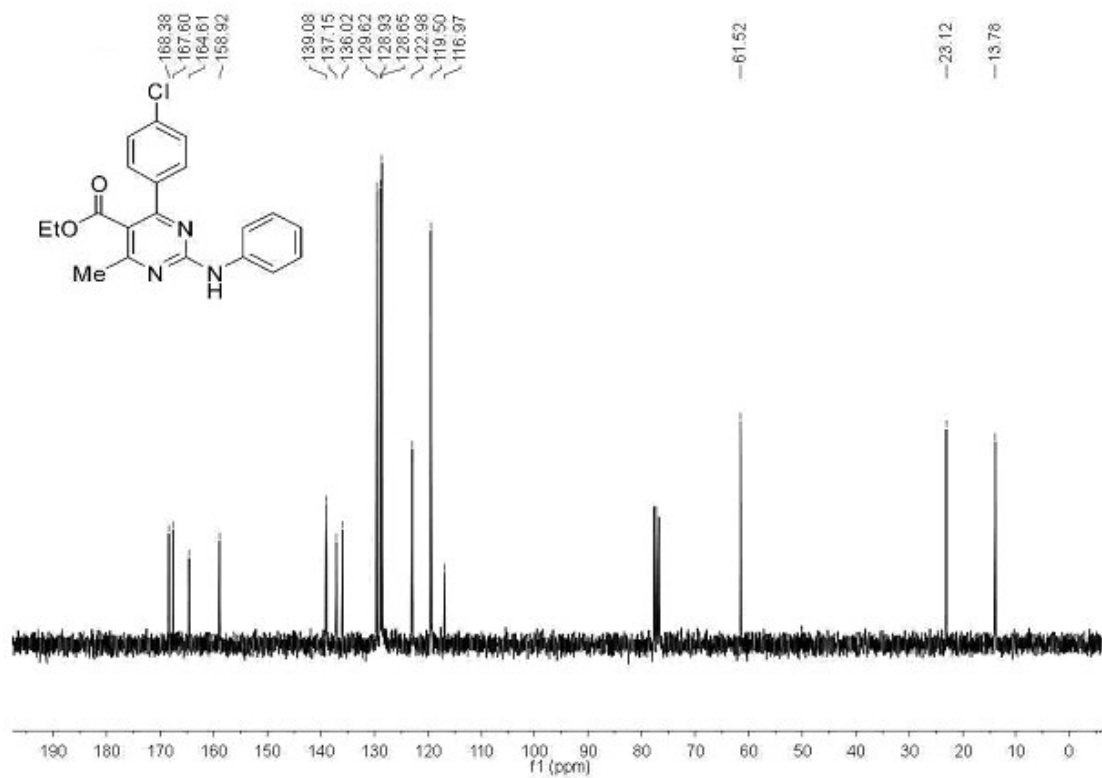

Supplement: c9ra06035a1.pdf [file c9ra06035a1.pdf]
